# Supplementary material
Source: PubMed Central journal article supplement (PMC9340092)
Supplement: sj-pdf-1-jrs-10.1177_01410768221077381.pdf [file sj-pdf-1-jrs-10.1177_01410768221077381.pdf]

## Supplementary data for

Lemp JM, Nuthanapati Prasad M, Bärnighausen TW, Vollmer S, Geldsetzer P, Anant J. Use of lifestyle interventions in primary care for individuals with newly diagnosed hypertension, hyperlipidemia, or obesity: a retrospective cohort study.

### Box S1. Search method for lifestyle intervention codes

We primarily identified codes for lifestyle intervention in CPRD Aurum by searching the “Term” variable of the complete medical code lists from the July 2020 release. The search terms were created by JLM and AJ and are partially informed by previous publications using electronic health records for lifestyle intervention research<sup>1-3</sup>.

#### *Search terms*

- a. “lifestyle” OR “program” OR “advice\*” OR “educat\*” OR “counsel\*” OR “information” OR (“intervention”) OR “signpost\*” OR “management” OR “club”
- b. “reduc\*” OR “loss” OR “intake”
- c. “exercise” OR “physical” OR OR “weight” OR “obes\*” OR “hypertens\*” OR “cardiovascular” OR “diet\*” OR “eat\*” OR “nutri\*” OR “food”

This string-based, case-insensitive algorithm was implemented in R. Two researchers of our team independently assessed the terms for inclusion and results were subsequently compared.

#### *Additional resources reviewed*

To make sure that we have included all relevant terms in our search, we performed a “backwards search” with SNOMED concepts IDs (<https://snomedbrowser.com>).

#### *Sources*

1. Jani A, Liyanage H, Okusi C, et al. Using an Ontology to Facilitate More Accurate Coding of Social Prescriptions Addressing Social Determinants of Health: Feasibility Study. *J Med Internet Res*. 2020;22(12):e23721. doi:10.2196/23721
2. Caliber, Health Data Research UK. CALIBER database. doi:<https://caliberresearch.org/>. Published 2020. Accessed March 26, 2021.
3. CPRD@Cambridge. Code Lists. [https://www.phpc.cam.ac.uk/pcu/research/research-groups/crmh/cprd\\_cam/codelists/](https://www.phpc.cam.ac.uk/pcu/research/research-groups/crmh/cprd_cam/codelists/). Published 2020. Accessed March 26, 2021.

**Table S1. CPRD codes for diagnoses.**

| Term                                                               | CPRD code        | Read code | Snomed concept ID |
|--------------------------------------------------------------------|------------------|-----------|-------------------|
| <i>Hypertension</i>                                                |                  |           |                   |
| [RFC] Hypertension                                                 | 909441000006118  | NA        | 909441000006102   |
| Accelerated essential hypertension                                 | 3784371000006115 | NA        | 78975002          |
| Benign essential hypertension                                      | 3135013          | G201.00   | 1201005           |
| Benign hypertensive heart AND renal disease                        | 109700019        | G231.00   | 66052004          |
| Benign hypertensive heart disease                                  | 60444016         | G211.00   | 36221001          |
| Benign hypertensive heart disease NOS                              | 299654011        | G211z00   | 36221001          |
| Benign hypertensive heart disease with CCF                         | 504901000006118  | G211100   | 194767001         |
| Benign hypertensive heart disease without CCF                      | 504911000006115  | G211000   | 77970009          |
| Benign hypertensive heart disease without congestive heart failure | 3768511000006114 | NA        | 77970009          |
| BP - hypertensive disease                                          | 523801000006119  | G2...11   | 38341003          |
| BP+ - Hypertension                                                 | 3117501000006115 | NA        | 38341003          |
| Cardiomegaly - hypertensive                                        | 411508017        | G21z011   | 275516004         |
| Chronic peripheral venous hypertension                             | 2645973019       | G8y3.00   | 423674003         |
| Diastolic hypertension                                             | 80224019         | G203.00   | 48146000          |
| Essential hypertension                                             | 99042012         | G20..00   | 59621000          |
| Essential hypertension NOS                                         | 395751018        | G20z.00   | 59621000          |
| HHD - Hypertensive heart disease                                   | 3552531000006110 | NA        | 64715009          |
| High blood pressure disorder                                       | 3117491000006111 | NA        | 38341003          |
| HT - Hypertension                                                  | 3117481000006113 | NA        | 38341003          |
| HTN - Hypertension                                                 | 3117511000006117 | NA        | 38341003          |
| Hypertension confirmed                                             | 1823901000006112 | NA        | 1823901000006108  |
| Hypertension NOS                                                   | 790121000006116  | G20z.11   | 38341003          |
| Hypertensive cardiomegaly                                          | 3552511000006116 | NA        | 64715009          |
| Hypertensive cardiopathy                                           | 3552501000006119 | NA        | 64715009          |
| Hypertensive cardiovascular disease                                | 3552521000006112 | NA        | 64715009          |
| Hypertensive disease                                               | 64168014         | G2...00   | 38341003          |

| Term                                                          | CPRD code        | Read code | Snomed concept ID |
|---------------------------------------------------------------|------------------|-----------|-------------------|
| <i>Hypertension (continued)</i>                               |                  |           |                   |
| Hypertensive disease NOS                                      | 299687010        | G2z..00   | 38341003          |
| Hypertensive disorder, systemic arterial                      | 3117521000006113 | NA        | 38341003          |
| Hypertensive heart AND renal disease                          | 143003017        | G23..00   | 86234004          |
| Hypertensive heart and renal disease NOS                      | 299675015        | G23z.00   | 86234004          |
| Hypertensive heart and renal disease with renal failure       | 299673010        | G233.00   | 194780003         |
| Hypertensive heart disease                                    | 107545013        | G21..00   | 64715009          |
| Hypertensive heart disease NOS                                | 741661000006118  | G21z.00   | 64715009          |
| Hypertensive heart disease NOS                                | 299655012        | G21zz00   | 64715009          |
| Hypertensive heart disease NOS with CCF                       | 741681000006111  | G21z100   | 64715009          |
| Hypertensive heart disease NOS without CCF                    | 741691000006114  | G21z000   | 64715009          |
| Hypertensive heart&renal dis wth (congestive) heart failure   | 741701000006114  | G232.00   | 194779001         |
| Hypertensive renal + heart dis                                | 884131000006114  | G23..99   | 86234004          |
| Idiopathic hypertension                                       | 3468491000006113 | NA        | 59621000          |
| Primary hypertension                                          | 99047018         | G20..12   | 59621000          |
| Severe hypertension                                           | 1806141000006113 | NA        | 1806141000006109  |
| Severe hypertension                                           | 2193021000000110 | G26..11   | 843841000000109   |
| Severe hypertension (Nat Inst for Health Clinical Ex 2011)    | 1846961000006115 | G26..00   | 843841000000109   |
| Stage 1 hyperten (NICE 2011) with evidnce end organ damage    | 1908721000006111 | G251.00   | 908651000000101   |
| Stage 1 hyperten (NICE 2011) without evidnce end organ damage | 1908711000006115 | G250.00   | 908631000000108   |
| Stage 1 hypertension                                          | 1806071000006118 | NA        | 1806071000006102  |
| Stage 1 hypertension                                          | 2193031000000112 | G25..11   | 843821000000102   |
| Stage 1 hypertension (NICE - Nat Ins for Hth Clin Excl 2011)  | 1846941000006119 | G25..00   | 843821000000102   |
| Stage 2 hypertension                                          | 8286581000006114 | NA        | 846371000000103   |
| Stage 2 hypertension                                          | 1806081000006115 | NA        | 1806081000006104  |
| Stage 2 hypertension (NICE - Nat Ins for Hth Clin Excl 2011)  | 1846991000006111 | G28..00   | 846371000000103   |
| Systemic arterial hypertension                                | 3117461000006115 | NA        | 38341003          |

| Term                                                     | CPRD code        | Read code | Snomed concept ID |
|----------------------------------------------------------|------------------|-----------|-------------------|
| <i>Hypertension (continued)</i>                          |                  |           |                   |
| Systemic primary arterial hypertension                   | 3468501000006117 | NA        | 59621000          |
| Systolic hypertension                                    | 93494011         | G202.00   | 56218007          |
| VTE risk assessment - uncontrolled systolic hypertension | 1992471000006116 | NA        | 1992471000006100  |
| <i>Hyperlipidemia</i>                                    |                  |           |                   |
| [X]other hyperlipidaemia                                 | 293821018        | NA        | NA                |
| Hld - hyperlipidaemia                                    | 3406791000006119 | NA        | NA                |
| Hld - hyperlipidemia                                     | 3406781000006117 | NA        | NA                |
| Hypercholesterolaemia                                    | 475418015        | C329.00   | 13644009          |
| Hypercholesterolemia                                     | 2716211000006115 | NA        | 13644009          |
| Hyperlipidaemia nos                                      | 293299018        | NA        | NA                |
| Hyperlipidemia                                           | 3406761000006110 | NA        | 55822004          |
| Hypertriglyceridaemia                                    | 444854010        | C321000   | 302870006         |
| Hypertriglyceridemia                                     | 5912411000006113 | NA        | 302870006         |
| Low density lipoproteinaemia                             | 735661000006117  | C320.13   | 398036000         |
| Low-density-lipoprotein-type (ldl) hyperlipoproteinaemia | 734191000006118  | NA        | 398036000         |
| Sporadic hypercholesterolaemia                           | 5116941000006118 | NA        | 238077000         |
| Sporadic hypercholesterolemia                            | 5116931000006111 | NA        | 238077000         |
| <i>Obesity</i>                                           |                  |           |                   |
| [RFC] Obesity                                            | 907161000006115  |           | 907161000006104   |
| [X]Obesity and other hyperalimentation                   | 293802014        | Cyu7.00   | 414916001         |
| [X]Other obesity                                         | 293803016        | Cyu7000   | 414916001         |
| Adult-onset obesity                                      | 436946011        | C380600   | 296526005         |
| Adult-onset obesity                                      | 1749491000006110 | NA        | 1749491000006108  |
| Alimentary obesity                                       | 6878871000006110 | NA        | 415530009         |
| BMI (body mass index) 40+ - severely obese               | 6763401000006110 | NA        | 408512008         |
| BMI 30+ - obesity                                        | 4553741000006110 | NA        | 162864005         |
| Body mass index 30+ - obesity                            | 253848011        | 22K5.00   | 162864005         |
| Body mass index 40+ - morbidly obese                     | 6763391000006110 | NA        | 408512008         |

|                                                     |                   |         |                  |
|-----------------------------------------------------|-------------------|---------|------------------|
| <i>Obesity (continued)</i>                          |                   |         |                  |
| Body mass index 40+ - severely obese                | 2160062010        | 22K7.00 | 408512008        |
| Central obesity                                     | 370698013         | C380400 | 248311001        |
| Exogenous obesity                                   | 6878851000006110  | NA      | 415530009        |
| Extreme obesity with alveolar hypoventilation       | 293635019         | C380200 | 190966007        |
| Generalised obesity                                 | 356966014         | C380500 | 238134004        |
| Generalized obesity                                 | 5117901000006110  | NA      | 238134004        |
| Hyperalimantation incl.obesity                      | 881831000006116   | C38..99 | 640791000000105  |
| Lifelong obesity                                    | 1749501000006110  | NA      | 1749501000006100 |
| Lifelong obesity                                    | 434770018         | C380700 | 294493008        |
| Localized obesity                                   | 5517051000006110  | NA      | 270486005        |
| Maternal obesity syndrome                           | 74689019          | L161.12 | 44772007         |
| Maternal obesity without hypertension               | 3222101000006110  | NA      | 44772007         |
| Moderately obese                                    | 857321000006113   | NA      | 857321000006109  |
| Morbid obesity                                      | 356968010         | C380300 | 238136002        |
| O/E - obese                                         | 253576010         | 22A5.11 | 162690006        |
| O/E - obese                                         | 280881000006115   | 222A.00 | 162690006        |
| Obese class I (body mass index 30.0 - 34.9)         | 2350241000000110  | 22KC.00 | 914721000000105  |
| Obese class II (body mass index 35.0 - 39.9)        | 2350261000000110  | 22KD.00 | 914731000000107  |
| Obese class III (BMI equal to or greater than 40.0) | 1900331000006110  | 22KE.00 | 914741000000103  |
| Obesity                                             | 2535065012        | C380.00 | 414916001        |
| Obesity and other hyperalimantation                 | 293631011         | C38..00 | 302872003        |
| Obesity and other hyperalimantation                 | 12726701000006100 | NA      | 640791000000105  |
| Obesity and other hyperalimantation NOS             | 293650011         | C38z.00 | 302872003        |
| Obesity due to excess calories                      | 2537960015        | C380000 | 415530009        |
| Obesity hypoventilation syndrome                    | 1803041000000110  | C38y011 | 190966007        |
| Obesity of face and trunk, sparing limbs            | 5255801000006110  | NA      | 248311001        |
| On examination - obese                              | 4550451000006110  | NA      | 162690006        |
| Simple obesity NOS                                  | 451432013         | C38z000 | 415530009        |
| Truncal obesity                                     | 5255821000006110  | NA      | 248311001        |
| Very obese                                          | 857911000006118   | NA      | 857911000006102  |

**Table S2. CPRD codes for extended diagnoses (used only in sensitivity analysis).**

| Term                                              | CPRD code         |
|---------------------------------------------------|-------------------|
| <i>Hypertension</i>                               |                   |
| [D]Raised blood pressure reading                  | 317910016         |
| Blood pressure elevation                          | 2885791000006114  |
| BP - High blood pressure                          | 3117451000006117  |
| Finding of increased blood pressure               | 2885771000006113  |
| HBP - High blood pressure                         | 3117471000006110  |
| High blood pressure                               | 3117411000006118  |
| High blood pressure                               | 64172013          |
| O/E - BP reading raised                           | 254072010         |
| O/E - BP reading very high                        | 254073017         |
| On examination - blood pressure reading raised    | 4556501000006118  |
| On examination - blood pressure reading very high | 4556531000006114  |
| On examination - BP reading raised                | 4556511000006115  |
| On examination - BP reading very high             | 4556541000006116  |
| Other specified hypertensive disease              | 299686018         |
| <i>Hyperlipidemia</i>                             |                   |
| Dyslipidaemia                                     | 2642990018        |
| High blood cholesterol/triglycerides              | 6347391000006113  |
| High cholesterol                                  | 2716221000006111  |
| Lipids abnormal                                   | 259215011         |
| Serum cholesterol borderline                      | 259228016         |
| Serum cholesterol borderline                      | 12716491000006111 |
| Serum cholesterol raised                          | 259229012         |
| Serum cholesterol very high                       | 259230019         |
| Serum lipids high                                 | 259212014         |
| Serum triglycerides borderline                    | 12716501000006115 |
| Serum triglycerides borderline                    | 259257017         |
| Serum triglycerides raised                        | 259258010         |

|                                            |  |
|--------------------------------------------|--|
| <i>Obesity</i>                             |  |
| No additional codes for extended diagnosis |  |

**Table S3. CPRD codes for exclusion diagnoses.**

| Term                                                                         | CPRD code        | Read code | Snomed concept ID |
|------------------------------------------------------------------------------|------------------|-----------|-------------------|
| <i>Hyperlipidemia</i>                                                        |                  |           |                   |
| A-beta-lipoproteinaemia                                                      | 435351000006118  | C325300   | 190787008         |
| Bassen-Kornzweig disease                                                     | 503961000006115  | C325311   | 190787008         |
| Bassen-Kornzweig disease                                                     | 4759731000006113 | NA        | 190787008         |
| Burger - Grute syndrome                                                      | 527691000006116  | C323.11   | 267435002         |
| Disorder Of Cholesterol Metabolism                                           | 192452016        | NA        | 123963007         |
| Disorder Of Lipoid Metabolism Nos                                            | 293354011        | NA        | 267431006         |
| Essential familial hypercholesterolaemia                                     | 6596651000006117 | NA        | 398036000         |
| Essential familial hypercholesterolemia                                      | 6596661000006115 | NA        | 398036000         |
| Familial combined hyperlipidaemia                                            | 356800016        | C322000   | 238040008         |
| Familial combined hyperlipidemia                                             | 5116221000006117 | NA        | 238040008         |
| Familial defective apolipoprotein B-100                                      | 356878012        | C320500   | 238081000         |
| Familial hyperbetalipoproteinaemia and hyperprebetalipoproteinaemia          | 6612021000006112 | NA        | 398796005         |
| Familial hypercholesterolaemia                                               | 1773186016       | C320000   | 398036000         |
| Familial hypercholesterolaemia                                               | 666301000006115  | C320.11   | 398036000         |
| Familial hypercholesterolaemia due to genetic defect of apolipoprotein B-100 | 5117061000006118 | NA        | 238081000         |
| Familial hypercholesterolaemia with hyperlipaemia                            | 6611951000006110 | NA        | 398796005         |
| Familial hypercholesterolemia                                                | 6596631000006112 | NA        | 398036000         |
| Familial hypercholesterolemia with hyperlipemia                              | 6612071000006113 | NA        | 398796005         |
| Familial hyperchylomicronaemia                                               | 5500501000006119 | NA        | 267435002         |
| Familial lipoprotein lipase deficiency                                       | 5117171000006114 | NA        | 238086005         |
| FCHL - Familial combined hyperlipidaemia                                     | 5116281000006118 | NA        | 238040008         |
| FCHL - Familial combined hyperlipidemia                                      | 5116241000006112 | NA        | 238040008         |
| FDB - Familial defective apolipoprotein B-100                                | 5117051000006115 | NA        | 238081000         |
| Fredrickson type I hyperlipoproteinaemia                                     | 5117191000006110 | NA        | 238086005         |
| Fredrickson type I hyperlipoproteinemia                                      | 5117181000006112 | NA        | 238086005         |
| Fredrickson type IIa lipidaemia                                              | 794161000006118  | C320.12   | 398036000         |



| Term                                         | CPRD code        | Read code | Snomed concept ID |
|----------------------------------------------|------------------|-----------|-------------------|
| <i>Hyperlipidemia (continued)</i>            |                  |           |                   |
| Fredrickson type IIb hyperlipoproteinaemia   | 5116291000006115 | NA        | 238040008         |
| Fredrickson type IIb hyperlipoproteinemia    | 5116251000006114 | NA        | 238040008         |
| Fredrickson type IIb lipidaemia              | 794171000006113  | C322.11   | 238040008         |
| Fredrickson type III hyperlipoproteinaemia   | 6611911000006114 | NA        | 398796005         |
| Fredrickson type III hyperlipoproteinemia    | 6612061000006118 | NA        | 398796005         |
| Fredrickson type III lipidaemia              | 794181000006111  | C322.12   | 398796005         |
| Fredrickson type IV hyperlipoproteinaemia    | 5117131000006111 | NA        | 238085009         |
| Fredrickson type IV lipidaemia               | 356886012        | C321.11   | 238085009         |
| Fredrickson type IV lipidemia                | 5117161000006119 | NA        | 238085009         |
| Fredrickson type V hyperlipoproteinemia      | 3053141000006116 | NA        | 34349009          |
| Fredrickson type V lipaemia                  | 794201000006112  | C323.13   | 34349009          |
| Fredricksons hyperlipoproteinaemia, type IIa | 794211000006110  | C320400   | 398036000         |
| High density lipid deficiency                | 293303011        | C325000   | 448834003         |
| Hyperbetalipoproteinaemia                    | 293259016        | C320100   | 190773008         |
| Hyperchylomicronaemia                        | 398868013        | C323.00   | 267435002         |
| Hyperlipidaemia, group A                     | 293262018        | C320200   | 190774002         |
| Hyperlipidemia, group A                      | 4759631000006116 | NA        | 190774002         |
| Hypo-beta-lipoproteinaemia                   | 293307012        | C325200   | 190786004         |
| Isolated lipase deficiency                   | 3784111000006114 | NA        | 78960005          |
| Lipase deficiency                            | 742721000006110  | C32y400   | 78960005          |
| Lipoprotein deficiency nos                   | 293313015        | NA        | NA                |
| Lipoprotein Deficiencies                     | 223421000000114  | NA        | NA                |
| Mixed hyperlipidaemia                        | 398856016        | C322.00   | 267434003         |
| Mixed hyperlipidemia                         | 5500491000006110 | NA        | 267434003         |
| Multiple-type hyperlipidaemia                | 5500471000006114 | NA        | 267434003         |
| Multiple-type hyperlipidemia                 | 5500481000006112 | NA        | 267434003         |
| Other specified pure hypercholesterolaemia   | 293267012        | C320y00   | 13644009          |
| Other Disorders of Lipoid Metabolism         | 293342011        | NA        | 267431006         |
| Polygenic hypercholesterolaemia              | 356867016        | C320600   | 238077000         |

| Term                                                     | CPRD code        | Read code | Snomed concept ID |
|----------------------------------------------------------|------------------|-----------|-------------------|
| <i>Hyperlipidemia (continued)</i>                        |                  |           |                   |
| Polygenic hypercholesterolemia                           | 5116951000006116 | NA        | 238077000         |
| Possible familial hypercholesterolaemia                  | 1659061000000112 | 1W1..00   | 473145005         |
| Possible familial hypercholesterolemia                   | 7483481000006112 | NA        | 473145005         |
| Primary familial xanthomatosis                           | 201018013        | C327311   | 82500001          |
| Probable familial hypercholesterolaemia                  | 2241371000000117 | 1W2..00   | 867261000000106   |
| Pure hypercholesterolaemia                               | 398852019        | C320.00   | 267432004         |
| Pure hypercholesterolaemia NOS                           | 293270011        | C320z00   | 267432004         |
| Pure hypercholesterolemia                                | 5500431000006111 | NA        | 267432004         |
| Pure hyperglyceridaemia                                  | 398855017        | C321.00   | 267433009         |
| Remnant hyperlipidaemia                                  | 6611931000006115 | NA        | 398796005         |
| Tangier disease                                          | 26027016         | C325.11   | 15346004          |
| Wolman disease                                           | 505109013        | C327300   | 82500001          |
| Wolman xanthomatosis                                     | 3841991000006111 | NA        | 82500001          |
| Wolman's disease                                         | 3841951000006117 | NA        | 82500001          |
| <i>Obesity (continued)</i>                               |                  |           |                   |
| Alstrom syndrome                                         | 105880017        | PKyF.00   | 63702009          |
| Bardet-Biedl syndrome                                    | 2589171000006110 | NA        | 5619004           |
| Cohen syndrome                                           | 94131019         | PKy5K00   | 56604005          |
| Dwarfism-hepatomegaly-obesity-juvenile diabetes syndrome | 3812041000006116 | NA        | 80660001          |
| Hypothalamic infantilism with obesity syndrome           | 3524221000006117 | NA        | 62999006          |
| Laurence-Moon-Biedl syndrome                             | 10374011         | PKy1.00   | 5619004           |
| LMBB - Laurence-Moon-Bardet-Biedl syndrome               | 2589191000006111 | NA        | 5619004           |
| Prader-Willi syndrome                                    | 148214012        | PKy0.12   | 89392001          |
| Prader-Willi Syndrome                                    | 212921000006112  | PKy0.11   | 89392001          |

**Table S4. CPRD product codes for hypertension, lipid-lowering, and anti-obesity medication.**

| Product name                                 | Product code     | BNF Chapter | Dm+D ID           | Drug substance         |
|----------------------------------------------|------------------|-------------|-------------------|------------------------|
| <i>Hypertension medication</i>               |                  |             |                   |                        |
| Bendroflumethiazide 2.5mg tablets            | 3083141000033112 | 2020100     | 317919004         | Bendroflumethiazide    |
| Aprinox 2.5mg tablets                        | 74541000033119   | 2020100     | 672111000001100   | Bendroflumethiazide    |
| Neo-Naclex 5mg tablets                       | 965341000033114  | 2020100     | 817911000001100   | Bendroflumethiazide    |
| Aprinox 5mg tablets                          | 74641000033118   | 2020100     | 120911000001103   | Bendroflumethiazide    |
| Bendroflumethiazide 5mg tablets              | 3083241000033117 | 2020100     | 317920005         | Bendroflumethiazide    |
| Chlortalidone 50mg tablets                   | 3086241000033111 | 2020100     | 317935006         | Chlortalidone          |
| Hygroton 50mg tablets                        | 742841000033114  | 2020100     | 285911000001101   | Chlortalidone          |
| Navidrex 500microgram tablets                | 955441000033111  | 2020100     | 487811000001100   | Cyclopenthiiazide      |
| Cyclopenthiiazide 500microgram tablets       | 395041000033117  | 2020100     | 317940003         | Cyclopenthiiazide      |
| Indapamide 1.5mg modified-release tablets    | 765741000033116  | 2020100     | 317954006         | Indapamide             |
| Natrilix SR 1.5mg tablets                    | 953141000033119  | 2020100     | 456611000001108   | Indapamide             |
| Ethibide XL 1.5mg tablets                    | 4571241000033110 | 2020100     | 13824811000001102 | Indapamide             |
| Tensaid XL 1.5mg tablets                     | 4656741000033119 | 2020100     | 14242211000001100 | Indapamide             |
| Nindaxa 2.5 tablets                          | 769741000033118  | 2020100     | 424311000001108   | Indapamide hemihydrate |
| Natrilix 2.5mg tablets                       | 955341000033117  | 2020100     | 321811000001109   | Indapamide hemihydrate |
| Indapamide 2.5mg tablets                     | 768641000033118  | 2020100     | 317956008         | Indapamide hemihydrate |
| Metolazone 5mg tablets                       | 903541000033116  | 2020100     | 317965001         | Metolazone             |
| Xipamide 20mg tablets                        | 1543941000033111 | 2020100     | 317970008         | Xipamide               |
| Diurexan 20mg tablets                        | 470741000033113  | 2020100     | 348911000001105   | Xipamide               |
| Lasix 20mg tablets                           | 816341000033112  | 2020200     | 701611000001102   | Furosemide             |
| Furosemide 20mg tablets                      | 3092241000033113 | 2020200     | 317971007         | Furosemide             |
| Furosemide 40mg tablets                      | 3092341000033115 | 2020200     | 317972000         | Furosemide             |
| Froop 40mg tablets                           | 615541000033119  | 2020200     | 714311000001107   | Furosemide             |
| Lasix 40mg tablets                           | 816441000033118  | 2020200     | 79411000001107    | Furosemide             |
| Lasix 500mg tablets                          | 816541000033117  | 2020200     | 829911000001102   | Furosemide             |
| Furosemide 500mg tablets                     | 3092441000033114 | 2020200     | 317973005         | Furosemide             |
| Furosemide 20mg/5ml oral solution sugar free | 3091941000033111 | 2020200     | 318006003         | Furosemide             |

| Product name                                        | Product code     | BNF Chapter | Dm+D ID           | Drug substance          |
|-----------------------------------------------------|------------------|-------------|-------------------|-------------------------|
| <i>Hypertension medication (continued)</i>          |                  |             |                   |                         |
| Frusol 20mg/5ml oral solution                       | 1731541000033115 | 2020200     | 602811000001100   | Furosemide              |
| Frusol 40mg/5ml oral solution                       | 1731641000033119 | 2020200     | 494811000001105   | Furosemide              |
| Furosemide 40mg/5ml oral solution sugar free        | 3092041000033117 | 2020200     | 318007007         | Furosemide              |
| Bumetanide 1mg tablets                              | 172441000033118  | 2020200     | 318021009         | Bumetanide              |
| Bumetanide 5mg tablets                              | 172541000033117  | 2020200     | 318022002         | Bumetanide              |
| Bumetanide 1mg/5ml oral solution sugar free         | 169041000033112  | 2020200     | 318023007         | Bumetanide              |
| Torasemide 2.5mg tablets                            | 1450241000033116 | 2020200     | 318040003         | Torasemide              |
| Torem 2.5mg tablets                                 | 1449941000033115 | 2020200     | 3699711000001107  | Torasemide              |
| Torem 5mg tablets                                   | 1450041000033112 | 2020200     | 3700311000001109  | Torasemide              |
| Torasemide 5mg tablets                              | 1450341000033114 | 2020200     | 318041004         | Torasemide              |
| Torasemide 10mg tablets                             | 1450141000033111 | 2020200     | 318042006         | Torasemide              |
| Torem 10mg tablets                                  | 1449841000033111 | 2020200     | 3700811000001100  | Torasemide              |
| Bumetanide 2mg/4ml solution for injection ampoules  | 3858741000033112 | 2020200     | 35912911000001108 | Bumetanide              |
| Lasix 20mg/2ml solution for injection ampoules      | 811841000033111  | 2020200     | 9611000001104     | Furosemide              |
| Furosemide 20mg/2ml solution for injection ampoules | 3091841000033115 | 2020200     | 36061411000001102 | Furosemide              |
| Frusol 50mg/5ml oral solution                       | 1731741000033111 | 2020200     | 855611000001109   | Furosemide              |
| Furosemide 50mg/5ml oral solution sugar free        | 3092141000033118 | 2020200     | 36564411000001102 | Furosemide              |
| Amiloride 5mg tablets                               | 57141000033118   | 2020300     | 318052005         | Amiloride hydrochloride |
| Spironolactone 25mg tablets                         | 1374241000033118 | 2020300     | 318056008         | Spironolactone          |
| Aldactone 25mg tablets                              | 40541000033112   | 2020300     | 930511000001105   | Spironolactone          |
| Aldactone 50mg tablets                              | 40641000033113   | 2020300     | 921811000001103   | Spironolactone          |
| Spironolactone 50mg tablets                         | 1374341000033111 | 2020300     | 318057004         | Spironolactone          |
| Spironolactone 100mg tablets                        | 1374141000033113 | 2020300     | 318058009         | Spironolactone          |
| Spirospare 100 tablets                              | 1374541000033116 | 2020300     | 3411000001104     | Spironolactone          |
| Aldactone 100mg tablets                             | 40441000033111   | 2020300     | 421611000001100   | Spironolactone          |
| Triamterene 50mg capsules                           | 1455341000033115 | 2020300     | 318082004         | Triamterene             |

| Product name                                            | Product code     | BNF Chapter | Dm+D ID           | Drug substance                                  |
|---------------------------------------------------------|------------------|-------------|-------------------|-------------------------------------------------|
| <i>Hypertension medication (continued)</i>              |                  |             |                   |                                                 |
| Inspra 25mg tablets                                     | 3199041000033116 | 2020300     | 8477211000001104  | Eplerenone                                      |
| Eplerenone 25mg tablets                                 | 3198841000033117 | 2020300     | 407011007         | Eplerenone                                      |
| Eplerenone 50mg tablets                                 | 3198941000033113 | 2020300     | 407012000         | Eplerenone                                      |
| Inspra 50mg tablets                                     | 3199141000033117 | 2020300     | 8479811000001106  | Eplerenone                                      |
| Amilamont 5mg/5ml oral solution sugar free              | 2101641000033119 | 2020300     | 799711000001108   | Amiloride hydrochloride                         |
| Amiloride 5mg/5ml oral solution sugar free              | 53841000033117   | 2020300     | 35900111000001108 | Amiloride hydrochloride                         |
| Amiloride 2.5mg / Cyclopenthiazide 250microgram tablets | 1903541000033116 | 2020400     | 318096005         | Amiloride hydrochloride/<br>Cyclopenthiazide    |
| Navispare 2.5mg/250microgram tablets                    | 956741000033114  | 2020400     | 535711000001100   | Amiloride hydrochloride/<br>Cyclopenthiazide    |
| Amiloride 5mg / Bumetanide 1mg tablets                  | 1845641000033119 | 2020400     | 318097001         | Amiloride hydrochloride/ Bumetanide             |
| Kalspare tablets                                        | 796541000033115  | 2020400     | 3252011000001105  | Chlortalidone/ Triamterene                      |
| Triamterene 50mg / Chlortalidone 50mg tablets           | 3162341000033110 | 2020400     | 318100006         | Chlortalidone/ Triamterene                      |
| Triamterene 50mg / Furosemide 40mg tablets              | 3092741000033119 | 2020400     | 318101005         | Furosemide/ Triamterene                         |
| Frusene 50mg/40mg tablets                               | 615041000033112  | 2020400     | 25411000001108    | Furosemide/ Triamterene                         |
| Lasilactone 20mg/50mg capsules                          | 808841000033119  | 2020400     | 3645811000001107  | Furosemide/ Spironolactone                      |
| Spironolactone 50mg / Furosemide 20mg capsules          | 3162541000033115 | 2020400     | 318102003         | Furosemide/ Spironolactone                      |
| Co-amilozide 2.5mg/25mg tablets                         | 376941000033117  | 2020400     | 318121006         | Amiloride hydrochloride/<br>Hydrochlorothiazide |
| Moduret 25 tablets                                      | 935441000033112  | 2020400     | 314211000001100   | Amiloride hydrochloride/<br>Hydrochlorothiazide |
| Aldactide 25 tablets                                    | 40241000033110   | 2020400     | 762511000001105   | Hydroflumethiazide/ Spironolactone              |
| Co-flumactone 25mg/25mg tablets                         | 377041000033116  | 2020400     | 318127005         | Hydroflumethiazide/ Spironolactone              |
| Co-flumactone 50mg/50mg tablets                         | 377141000033117  | 2020400     | 318128000         | Hydroflumethiazide/ Spironolactone              |
| Aldactide 50 tablets                                    | 40341000033117   | 2020400     | 4669111000001107  | Hydroflumethiazide/ Spironolactone              |
| Frumil LS 20mg/2.5mg tablets                            | 614341000033113  | 2020400     | 550711000001106   | Amiloride hydrochloride/ Furosemide             |
| Co-amilofruse 2.5mg/20mg tablets                        | 376841000033113  | 2020400     | 318135008         | Amiloride hydrochloride/ Furosemide             |
| Co-amilofruse 5mg/40mg tablets                          | 376641000033112  | 2020400     | 318136009         | Amiloride hydrochloride/ Furosemide             |
| Frumil 40mg/5mg tablets                                 | 614641000033117  | 2020400     | 427411000001106   | Amiloride hydrochloride/ Furosemide             |

| Product name                                      | Product code     | BNF Chapter | Dm+D ID         | Drug substance                                  |
|---------------------------------------------------|------------------|-------------|-----------------|-------------------------------------------------|
| <i>Hypertension medication (continued)</i>        |                  |             |                 |                                                 |
| Froop Co 5mg/40mg tablets                         | 1611441000033117 | 2020400     | 331311000001103 | Amiloride hydrochloride/ Furosemide             |
| Lasoride 5mg/40mg tablets                         | 818941000033112  | 2020400     | 678511000001106 | Amiloride hydrochloride/ Furosemide             |
| Fru-Co 5mg/40mg tablets                           | 615241000033116  | 2020400     | 818511000001106 | Amiloride hydrochloride/ Furosemide             |
| Frumil Forte 10mg/80mg tablets                    | 615641000033118  | 2020400     | 82611000001106  | Amiloride hydrochloride/ Furosemide             |
| Co-amilofruse 10mg/80mg tablets                   | 376741000033115  | 2020400     | 318137000       | Amiloride hydrochloride/ Furosemide             |
| Co-amilozide 5mg/50mg tablets                     | 369141000033118  | 2020400     | 377566005       | Amiloride hydrochloride/<br>Hydrochlorothiazide |
| Moduretic 5mg/50mg tablets                        | 935541000033113  | 2020400     | 453811000001103 | Amiloride hydrochloride/<br>Hydrochlorothiazide |
| Amil-Co 5mg/50mg tablets                          | 60341000033110   | 2020400     | 636611000001107 | Amiloride hydrochloride/<br>Hydrochlorothiazide |
| Co-triamterzide 50mg/25mg tablets                 | 370241000033111  | 2020400     | 410896007       | Hydrochlorothiazide/ Triamterene                |
| Triamaxco 50mg/25mg tablets                       | 1468141000033118 | 2020400     | 721311000001104 | Hydrochlorothiazide/ Triamterene                |
| Dyazide 50mg/25mg tablets                         | 492341000033115  | 2020400     | 132811000001106 | Hydrochlorothiazide/ Triamterene                |
| Triam-Co 50mg/25mg tablets                        | 1470341000033112 | 2020400     | 191211000001106 | Hydrochlorothiazide/ Triamterene                |
| Propranolol 10mg tablets                          | 1135041000033117 | 2040000     | 318352004       | Propranolol hydrochloride                       |
| Propranolol 40mg tablets                          | 1135241000033113 | 2040000     | 318353009       | Propranolol hydrochloride                       |
| Propranolol 80mg tablets                          | 1135341000033115 | 2040000     | 318354003       | Propranolol hydrochloride                       |
| Propranolol 160mg tablets                         | 1135141000033118 | 2040000     | 318355002       | Propranolol hydrochloride                       |
| Propranolol 160mg modified-release capsules       | 1124041000033116 | 2040000     | 318406005       | Propranolol hydrochloride                       |
| Beta-Prograne 160mg modified-release capsules     | 133141000033117  | 2040000     | 510611000001108 | Propranolol hydrochloride                       |
| Bedranol SR 160mg capsules                        | 124241000033112  | 2040000     | 549611000001106 | Propranolol hydrochloride                       |
| Slo-Pro 160mg capsules                            | 2929141000033117 | 2040000     | 240711000001100 | Propranolol hydrochloride                       |
| Bedranol SR 80mg capsules                         | 2711841000033114 | 2040000     | 573711000001104 | Propranolol hydrochloride                       |
| Half Beta-Prograne 80mg modified-release capsules | 660741000033115  | 2040000     | 724111000001103 | Propranolol hydrochloride                       |
| Propranolol 80mg modified-release capsules        | 1130041000033112 | 2040000     | 318407001       | Propranolol hydrochloride                       |
| Acebutolol 100mg capsules                         | 3041000033115    | 2040000     | 318412000       | Acebutolol hydrochloride                        |
| Sectral 100mg capsules                            | 1268141000033119 | 2040000     | 632811000001105 | Acebutolol hydrochloride                        |
| Sectral 200mg capsules                            | 1268241000033114 | 2040000     | 925711000001108 | Acebutolol hydrochloride                        |

| Product name                               | Product code     | BNF Chapter | Dm+D ID          | Drug substance           |
|--------------------------------------------|------------------|-------------|------------------|--------------------------|
| <i>Hypertension medication (continued)</i> |                  |             |                  |                          |
| Acebutolol 200mg capsules                  | 3141000033116    | 2040000     | 318413005        | Acebutolol hydrochloride |
| Acebutolol 400mg tablets                   | 10741000033112   | 2040000     | 318414004        | Acebutolol hydrochloride |
| Sectral 400mg tablets                      | 1278241000033118 | 2040000     | 298111000001105  | Acebutolol hydrochloride |
| Atenix 50 tablets                          | 92541000033118   | 2040000     | 271911000001106  | Atenolol                 |
| Tenormin LS 50mg tablets                   | 1426541000033115 | 2040000     | 423911000001107  | Atenolol                 |
| Tenormin 100mg tablets                     | 1426441000033116 | 2040000     | 162411000001102  | Atenolol                 |
| Atenix 100 tablets                         | 90541000033117   | 2040000     | 181611000001107  | Atenolol                 |
| Tenormin 25mg tablets                      | 1428741000033112 | 2040000     | 317111000001101  | Atenolol                 |
| Atenix 25 tablets                          | 91841000033113   | 2040000     | 482511000001101  | Atenolol                 |
| Trandate 100mg tablets                     | 1469041000033113 | 2040000     | 639011000001106  | Labetalol hydrochloride  |
| Labetalol 100mg tablets                    | 814041000033119  | 2040000     | 318445000        | Labetalol hydrochloride  |
| Labetalol 200mg tablets                    | 818641000033117  | 2040000     | 318446004        | Labetalol hydrochloride  |
| Trandate 200mg tablets                     | 1469141000033112 | 2040000     | 77311000001105   | Labetalol hydrochloride  |
| Trandate 400mg tablets                     | 1469241000033117 | 2040000     | 674711000001109  | Labetalol hydrochloride  |
| Labetalol 400mg tablets                    | 818741000033114  | 2040000     | 318447008        | Labetalol hydrochloride  |
| Labetalol 50mg tablets                     | 818841000033116  | 2040000     | 318458004        | Labetalol hydrochloride  |
| Trandate 50mg tablets                      | 1469341000033110 | 2040000     | 42611000001104   | Labetalol hydrochloride  |
| Lopresor 100mg tablets                     | 850841000033110  | 2040000     | 756911000001107  | Metoprolol tartrate      |
| Metoprolol 100mg tablets                   | 897741000033111  | 2040000     | 318474009        | Metoprolol tartrate      |
| Metoprolol 50mg tablets                    | 897841000033118  | 2040000     | 318475005        | Metoprolol tartrate      |
| Lopresor 50mg tablets                      | 850941000033119  | 2040000     | 113511000001109  | Metoprolol tartrate      |
| Nadolol 80mg tablets                       | 956541000033118  | 2040000     | 318481002        | Nadolol                  |
| Corgard 80mg tablets                       | 375341000033112  | 2040000     | 3687411000001106 | Nadolol                  |
| Oxprenolol 20mg tablets                    | 1026141000033119 | 2040000     | 318483004        | Oxprenolol hydrochloride |
| Oxprenolol 40mg tablets                    | 1026241000033114 | 2040000     | 318484005        | Oxprenolol hydrochloride |
| Oxprenolol 80mg tablets                    | 1026341000033116 | 2040000     | 318485006        | Oxprenolol hydrochloride |
| Pindolol 5mg tablets                       | 1091241000033112 | 2040000     | 318512002        | Pindolol                 |
| Visken 5mg tablets                         | 1524041000033111 | 2040000     | 3706111000001105 | Pindolol                 |
| Visken 15mg tablets                        | 1525141000033111 | 2040000     | 3887411000001101 | Pindolol                 |

| Product name                                     | Product code     | BNF Chapter | Dm+D ID          | Drug substance                                         |
|--------------------------------------------------|------------------|-------------|------------------|--------------------------------------------------------|
| <i>Hypertension medication (continued)</i>       |                  |             |                  |                                                        |
| Pindolol 15mg tablets                            | 1091141000033117 | 2040000     | 318513007        | Pindolol                                               |
| Sotalol 40mg tablets                             | 1367441000033117 | 2040000     | 318525005        | Sotalol hydrochloride                                  |
| Beta-Cardone 40mg tablets                        | 144041000033119  | 2040000     | 900511000001103  | Sotalol hydrochloride                                  |
| Sotacor 80mg tablets                             | 1366141000033111 | 2040000     | 463811000001109  | Sotalol hydrochloride                                  |
| Beta-Cardone 80mg tablets                        | 144141000033115  | 2040000     | 104011000001101  | Sotalol hydrochloride                                  |
| Sotalol 80mg tablets                             | 1367541000033116 | 2040000     | 318526006        | Sotalol hydrochloride                                  |
| Sotalol 200mg tablets                            | 1367241000033118 | 2040000     | 318527002        | Sotalol hydrochloride                                  |
| Beta-Cardone 200mg tablets                       | 143941000033116  | 2040000     | 447111000001104  | Sotalol hydrochloride                                  |
| Sotacor 160mg tablets                            | 1366041000033112 | 2040000     | 446211000001108  | Sotalol hydrochloride                                  |
| Sotalol 160mg tablets                            | 1367141000033113 | 2040000     | 318528007        | Sotalol hydrochloride                                  |
| Timolol 10mg tablets                             | 1444541000033113 | 2040000     | 318534000        | Timolol maleate                                        |
| Viskaldix tablets                                | 1523941000033114 | 2040000     | 3638411000001101 | Cloпамide/ Pindolol                                    |
| Pindolol 10mg / Cloпамide 5mg tablets            | 3163141000033117 | 2040000     | 318552000        | Cloпамide/ Pindolol                                    |
| Prestim tablets                                  | 1132741000033111 | 2040000     | 98411000001109   | Bendroflumethiazide/ Timolol maleate                   |
| Timolol 10mg / Bendroflumethiazide 2.5mg tablets | 3346641000033118 | 2040000     | 318556002        | Bendroflumethiazide/ Timolol maleate                   |
| Tenoret 50mg/12.5mg tablets                      | 1426241000033117 | 2040000     | 825011000001103  | Atenolol/ Chlortalidone                                |
| Atenix Co 50 tablets                             | 92441000033119   | 2040000     | 629011000001109  | Atenolol/ Chlortalidone                                |
| Co-tenidone 50mg/12.5mg tablets                  | 376441000033110  | 2040000     | 318575007        | Atenolol/ Chlortalidone                                |
| Kalten capsules                                  | 793741000033117  | 2040000     | 237011000001100  | Amiloride hydrochloride/ Atenolol/ Hydrochlorothiazide |
| Cardicor 5mg tablets                             | 1952541000033117 | 2040000     | 19711000001106   | Bisoprolol fumarate                                    |
| Emcor LS 5mg tablets                             | 513941000033117  | 2040000     | 483911000001101  | Bisoprolol fumarate                                    |
| Bipranix 5mg tablets                             | 2638041000033110 | 2040000     | 501211000001103  | Bisoprolol fumarate                                    |
| Soloc 5mg tablets                                | 2801941000033119 | 2040000     | 859411000001109  | Bisoprolol fumarate                                    |
| Vivacor 5mg tablets                              | 2866041000033110 | 2040000     | 9105811000001100 | Bisoprolol fumarate                                    |
| Bisoprolol 5mg tablets                           | 151341000033117  | 2040000     | 318590006        | Bisoprolol fumarate                                    |
| Bisoprolol 10mg tablets                          | 514741000033117  | 2040000     | 318591005        | Bisoprolol fumarate                                    |
| Vivacor 10mg tablets                             | 2866141000033114 | 2040000     | 9739311000001105 | Bisoprolol fumarate                                    |
| Cardicor 10mg tablets                            | 1952741000033113 | 2040000     | 890111000001100  | Bisoprolol fumarate                                    |



| Product name                                               | Product code     | BNF Chapter | Dm+D ID           | Drug substance           |
|------------------------------------------------------------|------------------|-------------|-------------------|--------------------------|
| <i>Hypertension medication (continued)</i>                 |                  |             |                   |                          |
| Soloc 10mg tablets                                         | 2802041000033113 | 2040000     | 544711000001103   | Bisoprolol fumarate      |
| Bipranix 10mg tablets                                      | 2638141000033114 | 2040000     | 405411000001107   | Bisoprolol fumarate      |
| Cardicor 1.25mg tablets                                    | 1952241000033119 | 2040000     | 712511000001106   | Bisoprolol fumarate      |
| Bisoprolol 1.25mg tablets                                  | 1951641000033111 | 2040000     | 318604001         | Bisoprolol fumarate      |
| Bisoprolol 2.5mg tablets                                   | 1951741000033119 | 2040000     | 318605000         | Bisoprolol fumarate      |
| Cardicor 2.5mg tablets                                     | 1952341000033112 | 2040000     | 628711000001102   | Bisoprolol fumarate      |
| Cardicor 3.75mg tablets                                    | 1952441000033118 | 2040000     | 823111000001103   | Bisoprolol fumarate      |
| Bisoprolol 3.75mg tablets                                  | 1951841000033112 | 2040000     | 318606004         | Bisoprolol fumarate      |
| Bisoprolol 7.5mg tablets                                   | 1951941000033116 | 2040000     | 318607008         | Bisoprolol fumarate      |
| Cardicor 7.5mg tablets                                     | 1952641000033116 | 2040000     | 404511000001105   | Bisoprolol fumarate      |
| Celectol 200mg tablets                                     | 236141000033110  | 2040000     | 864811000001100   | Celiprolol hydrochloride |
| Celiprolol 200mg tablets                                   | 236041000033111  | 2040000     | 318619000         | Celiprolol hydrochloride |
| Celiprolol 400mg tablets                                   | 233341000033116  | 2040000     | 318622003         | Celiprolol hydrochloride |
| Celectol 400mg tablets                                     | 233241000033114  | 2040000     | 479211000001100   | Celiprolol hydrochloride |
| Carvedilol 12.5mg tablets                                  | 209941000033111  | 2040000     | 318631003         | Carvedilol               |
| Carvedilol 25mg tablets                                    | 210041000033115  | 2040000     | 318632005         | Carvedilol               |
| Carvedilol 3.125mg tablets                                 | 1581241000033110 | 2040000     | 318633000         | Carvedilol               |
| Carvedilol 6.25mg tablets                                  | 1581341000033117 | 2040000     | 318635007         | Carvedilol               |
| Nebivolol 5mg tablets                                      | 1796141000033112 | 2040000     | 726011000001109   | Nebivolol hydrochloride  |
| Nebivolol 5mg tablets                                      | 1796041000033113 | 2040000     | 318640004         | Nebivolol hydrochloride  |
| Co-tenidone 100mg/25mg tablets                             | 376541000033111  | 2040000     | 377211005         | Atenolol/ Chlortalidone  |
| Atenix Co 100 tablets                                      | 90741000033113   | 2040000     | 101411000001108   | Atenolol/ Chlortalidone  |
| Tenoretic 100mg/25mg tablets                               | 1426341000033110 | 2040000     | 288711000001105   | Atenolol/ Chlortalidone  |
| Metoprolol 5mg/5ml solution for injection ampoules         | 887141000033113  | 2040000     | 3631211000001109  | Metoprolol tartrate      |
| Betaloc I.V. 5mg/5ml solution for injection ampoules       | 131141000033116  | 2040000     | 3615711000001109  | Metoprolol tartrate      |
| Brevibloc Premixed 100mg/10ml solution for injection vials | 5655241000033110 | 2040000     | 10070311000001104 | Esmolol hydrochloride    |
| Esmolol 100mg/10ml solution for injection vials            | 4202241000033117 | 2040000     | 35893311000001105 | Esmolol hydrochloride    |

| Product name                                              | Product code     | BNF Chapter | Dm+D ID           | Drug substance            |
|-----------------------------------------------------------|------------------|-------------|-------------------|---------------------------|
| <i>Hypertension medication (continued)</i>                |                  |             |                   |                           |
| Tenormin 25mg/5ml syrup                                   | 1424541000033110 | 2040000     | 373311000001100   | Atenolol                  |
| Tenif 50mg/20mg modified-release capsules                 | 1414941000033114 | 2040000     | 3142511000001102  | Atenolol/ Nifedipine      |
| Beta-Adalat modified-release capsules                     | 124341000033119  | 2040000     | 3142711000001107  | Atenolol/ Nifedipine      |
| Atenolol 50mg / Nifedipine 20mg modified-release capsules | 3246941000033118 | 2040000     | 35903311000001104 | Atenolol/ Nifedipine      |
| Tenormin 5mg/10ml solution for injection ampoules         | 1420741000033114 | 2040000     | 9111000001107     | Atenolol                  |
| Sotacor 40mg/4ml solution for injection ampoules          | 1358541000033113 | 2040000     | 694711000001100   | Sotalol hydrochloride     |
| Sotalol 40mg/4ml solution for injection ampoules          | 2908541000033114 | 2040000     | 35930811000001109 | Sotalol hydrochloride     |
| Syprol 10mg/5ml oral solution                             | 2267541000033111 | 2040000     | 28711000001109    | Propranolol hydrochloride |
| Propranolol 10mg/5ml oral solution sugar free             | 1125341000033118 | 2040000     | 35932311000001101 | Propranolol hydrochloride |
| Propranolol 1mg/1ml solution for injection ampoules       | 1119641000033117 | 2040000     | 35932611000001106 | Propranolol hydrochloride |
| Syprol 50mg/5ml oral solution                             | 2267641000033112 | 2040000     | 823311000001101   | Propranolol hydrochloride |
| Propranolol 50mg/5ml oral solution sugar free             | 1125541000033113 | 2040000     | 35932711000001102 | Propranolol hydrochloride |
| Syprol 5mg/5ml oral solution                              | 2267441000033110 | 2040000     | 295911000001102   | Propranolol hydrochloride |
| Propranolol 5mg/5ml oral solution sugar free              | 1125441000033112 | 2040000     | 35932811000001105 | Propranolol hydrochloride |
| Slow-Trasicor 160mg tablets                               | 1347441000033114 | 2040000     | 473011000001107   | Oxprenolol hydrochloride  |
| Oxprenolol 160mg modified-release tablets                 | 1026041000033118 | 2040000     | 36023011000001102 | Oxprenolol hydrochloride  |
| Lopresor SR 200mg tablets                                 | 851041000033112  | 2040000     | 916111000001108   | Metoprolol tartrate       |
| Metoprolol 200mg modified-release tablets                 | 891641000033111  | 2040000     | 36035411000001108 | Metoprolol tartrate       |
| Labetalol 100mg/20ml solution for injection ampoules      | 811341000033119  | 2040000     | 36037611000001104 | Labetalol hydrochloride   |
| Hydralazine 25mg tablets                                  | 741941000033113  | 2050100     | 318649003         | Hydralazine hydrochloride |
| Apresoline 25mg tablets                                   | 74341000033114   | 2050100     | 657011000001101   | Hydralazine hydrochloride |
| Hydralazine 50mg tablets                                  | 742041000033119  | 2050100     | 318650003         | Hydralazine hydrochloride |
| Minoxidil 2.5mg tablets                                   | 920841000033118  | 2050100     | 318655008         | Minoxidil                 |
| Loniten 2.5mg tablets                                     | 850541000033113  | 2050100     | 3667011000001104  | Minoxidil                 |

| Product name                                                     | Product code     | BNF Chapter | Dm+D ID           | Drug substance                 |
|------------------------------------------------------------------|------------------|-------------|-------------------|--------------------------------|
| <i>Hypertension medication (continued)</i>                       |                  |             |                   |                                |
| Loniten 5mg tablets                                              | 850641000033114  | 2050100     | 3666411000001106  | Minoxidil                      |
| Minoxidil 5mg tablets                                            | 920941000033114  | 2050100     | 318656009         | Minoxidil                      |
| Minoxidil 10mg tablets                                           | 920641000033119  | 2050100     | 318657000         | Minoxidil                      |
| Loniten 10mg tablets                                             | 850441000033112  | 2050100     | 3666711000001100  | Minoxidil                      |
| Sodium nitroprusside 50mg powder for solution for infusion vials | 1357141000033115 | 2050100     | 375899001         | Sodium nitroprusside dihydrate |
| Bosentan 62.5mg tablets                                          | 2845941000033110 | 2050100     | 407815004         | Bosentan monohydrate           |
| Tracleer 62.5mg tablets                                          | 2846041000033117 | 2050100     | 4765211000001107  | Bosentan monohydrate           |
| Tracleer 125mg tablets                                           | 2846241000033113 | 2050100     | 4765711000001100  | Bosentan monohydrate           |
| Bosentan 125mg tablets                                           | 2846141000033118 | 2050100     | 407816003         | Bosentan monohydrate           |
| Revatio 20mg tablets                                             | 3890741000033119 | 2050100     | 10154511000001109 | Sildenafil citrate             |
| Ventavis 10micrograms/ml nebuliser solution 1ml ampoules         | 4023741000033115 | 2050100     | 11383311000001107 | Iloprost trometamol            |
| Iloprost 10micrograms/1ml nebuliser liquid ampoules              | 4023641000033112 | 2050100     | 420370000         | Iloprost trometamol            |
| Volibris 10mg tablets                                            | 4521241000033111 | 2050100     | 13756111000001101 | Ambrisentan                    |
| Ambrisentan 10mg tablets                                         | 4521041000033115 | 2050100     | 428480001         | Ambrisentan                    |
| Ambrisentan 5mg tablets                                          | 4520941000033113 | 2050100     | 429662009         | Ambrisentan                    |
| Volibris 5mg tablets                                             | 4521141000033116 | 2050100     | 13755511000001103 | Ambrisentan                    |
| Sildenafil 10mg/ml oral suspension sugar free                    | 8234041000033110 | 2050100     | 21705011000001109 | Sildenafil citrate             |
| Revatio 10mg/ml oral suspension                                  | 8234141000033114 | 2050100     | 21700211000001108 | Sildenafil citrate             |
| Macitentan 10mg tablets                                          | 8962541000033116 | 2050100     | 23707811000001104 | Macitentan                     |
| Opsumit 10mg tablets                                             | 8962641000033115 | 2050100     | 23705711000001101 | Macitentan                     |
| Adempas 1.5mg tablets                                            | 9158041000033119 | 2050100     | 24399111000001104 | Riociguat                      |
| Riociguat 1.5mg tablets                                          | 9157441000033110 | 2050100     | 24408311000001103 | Riociguat                      |
| Riociguat 1mg tablets                                            | 9157341000033116 | 2050100     | 24408411000001105 | Riociguat                      |
| Adempas 1mg tablets                                              | 9157941000033117 | 2050100     | 24398411000001101 | Riociguat                      |
| Adempas 2.5mg tablets                                            | 9158241000033110 | 2050100     | 24400611000001105 | Riociguat                      |
| Riociguat 2.5mg tablets                                          | 9157641000033112 | 2050100     | 24408511000001109 | Riociguat                      |
| Riociguat 2mg tablets                                            | 9157541000033111 | 2050100     | 24408611000001108 | Riociguat                      |

| Product name                                                | Product code      | BNF Chapter | Dm+D ID           | Drug substance            |
|-------------------------------------------------------------|-------------------|-------------|-------------------|---------------------------|
| <i>Hypertension medication (continued)</i>                  |                   |             |                   |                           |
| Adempas 2mg tablets                                         | 9158141000033115  | 2050100     | 24399711000001103 | Riociguat                 |
| Adempas 0.5mg tablets                                       | 9157841000033113  | 2050100     | 24397911000001108 | Riociguat                 |
| Riociguat 500microgram tablets                              | 9157241000033114  | 2050100     | 24408711000001104 | Riociguat                 |
| Selexipag 200microgram tablets                              | 11734641000033115 | 2050100     | 32963211000001108 | Selexipag                 |
| Uptravi 200microgram tablets                                | 11735441000033118 | 2050100     | 32963411000001107 | Selexipag                 |
| Selexipag 400microgram tablets                              | 11734741000033112 | 2050100     | 32964011000001101 | Selexipag                 |
| Uptravi 400microgram tablets                                | 11735541000033117 | 2050100     | 32964211000001106 | Selexipag                 |
| Selexipag 600microgram tablets                              | 11734841000033119 | 2050100     | 32964411000001105 | Selexipag                 |
| Uptravi 600microgram tablets                                | 11735641000033116 | 2050100     | 32964611000001108 | Selexipag                 |
| Selexipag 800microgram tablets                              | 11734941000033110 | 2050100     | 32964811000001107 | Selexipag                 |
| Uptravi 800microgram tablets                                | 11735741000033113 | 2050100     | 32965011000001102 | Selexipag                 |
| Selexipag 1mg tablets                                       | 11735041000033110 | 2050100     | 32965211000001107 | Selexipag                 |
| Uptravi 1,000microgram tablets                              | 11735841000033115 | 2050100     | 32965411000001106 | Selexipag                 |
| Selexipag 1.2mg tablets                                     | 11735141000033114 | 2050100     | 32965611000001109 | Selexipag                 |
| Uptravi 1,200microgram tablets                              | 11735941000033111 | 2050100     | 32965811000001108 | Selexipag                 |
| Selexipag 1.4mg tablets                                     | 11735241000033119 | 2050100     | 32966011000001106 | Selexipag                 |
| Uptravi 1,400microgram tablets                              | 11736041000033118 | 2050100     | 32966211000001101 | Selexipag                 |
| Selexipag 1.6mg tablets                                     | 11735341000033112 | 2050100     | 32966411000001102 | Selexipag                 |
| Uptravi 1,600microgram tablets                              | 11736141000033119 | 2050100     | 32966611000001104 | Selexipag                 |
| Apresoline 20mg powder for solution for injection ampoules  | 73441000033117    | 2050100     | 3925011000001100  | Hydralazine hydrochloride |
| Hydralazine 20mg powder for solution for injection ampoules | 734141000033114   | 2050100     | 34193811000001100 | Hydralazine hydrochloride |
| Catapres 100microgram tablets                               | 215341000033112   | 2050200     | 215111000001101   | Clonidine hydrochloride   |
| Catapres 300microgram tablets                               | 215441000033118   | 2050200     | 368711000001103   | Clonidine hydrochloride   |
| Methyldopa 125mg tablets                                    | 897341000033110   | 2050200     | 318671008         | Methyldopa anhydrous      |
| Methyldopa 250mg tablets                                    | 897441000033116   | 2050200     | 318672001         | Methyldopa anhydrous      |
| Aldomet 250mg tablets                                       | 40941000033118    | 2050200     | 253711000001107   | Methyldopa anhydrous      |
| Aldomet 500mg tablets                                       | 41041000033111    | 2050200     | 73611000001108    | Methyldopa anhydrous      |
| Methyldopa 500mg tablets                                    | 897541000033115   | 2050200     | 318673006         | Methyldopa anhydrous      |

| Product name                                                  | Product code     | BNF Chapter | Dm+D ID          | Drug substance                 |
|---------------------------------------------------------------|------------------|-------------|------------------|--------------------------------|
| <i>Hypertension medication (continued)</i>                    |                  |             |                  |                                |
| Moxonidine 200microgram tablets                               | 938541000033115  | 2050200     | 318707000        | Moxonidine                     |
| Physiotens 200microgram tablets                               | 1080841000033119 | 2050200     | 41111000001102   | Moxonidine                     |
| Physiotens 400microgram tablets                               | 1080941000033110 | 2050200     | 142811000001107  | Moxonidine                     |
| Moxonidine 400microgram tablets                               | 938641000033119  | 2050200     | 318708005        | Moxonidine                     |
| Moxonidine 300microgram tablets                               | 2635641000033111 | 2050200     | 408604009        | Moxonidine                     |
| Physiotens 300microgram tablets                               | 2635741000033119 | 2050200     | 522011000001109  | Moxonidine                     |
| Sildenafil 20mg tablets                                       | 3890641000033111 | 2050200     | 419015002        | Sildenafil citrate             |
| Felodipine 2.5mg modified-release /<br>Ramipril 2.5mg tablets | 3163341000033119 | 2050501     | 318176004        | Felodipine/ Ramipril           |
| Triapin 2.5mg/2.5mg modified-release<br>tablets               | 8264941000033119 | 2050501     | 4093211000001109 | Felodipine/ Ramipril           |
| Triapin 5mg/5mg modified-release tablets                      | 1834341000033110 | 2050501     | 3887911000001109 | Felodipine/ Ramipril           |
| Felodipine 5mg modified-release /<br>Ramipril 5mg tablets     | 3163241000033112 | 2050501     | 318177008        | Felodipine/ Ramipril           |
| Co-zidocapt 12.5mg/25mg tablets                               | 1893141000033119 | 2050501     | 318806002        | Captopril/ Hydrochlorothiazide |
| Co-zidocapt 25mg/50mg tablets                                 | 1893241000033114 | 2050501     | 318807006        | Captopril/ Hydrochlorothiazide |
| Acezide 25mg/50mg tablets                                     | 13141000033119   | 2050501     | 263311000001101  | Captopril/ Hydrochlorothiazide |
| Capozide 25mg/50mg tablets                                    | 216441000033110  | 2050501     | 17311000001102   | Captopril/ Hydrochlorothiazide |
| Capoten 12.5mg tablets                                        | 214141000033113  | 2050501     | 134511000001103  | Captopril                      |
| Ecopace 12.5mg tablets                                        | 2945841000033112 | 2050501     | 221411000001104  | Captopril                      |
| Acepril 12.5mg tablets                                        | 10841000033119   | 2050501     | 660111000001107  | Captopril                      |
| Tensopril 12.5mg tablets                                      | 2928341000033114 | 2050501     | 673711000001107  | Captopril                      |
| Kaplon 12.5mg tablets                                         | 1622041000033110 | 2050501     | 777711000001105  | Captopril                      |
| Captopril 12.5mg tablets                                      | 213441000033119  | 2050501     | 318820009        | Captopril                      |
| Captopril 25mg tablets                                        | 214441000033117  | 2050501     | 318821008        | Captopril                      |
| Ecopace 25mg tablets                                          | 2945941000033116 | 2050501     | 817411000001108  | Captopril                      |
| Acepril 25mg tablets                                          | 10941000033110   | 2050501     | 517711000001103  | Captopril                      |
| Kaplon 25mg tablets                                           | 1622141000033114 | 2050501     | 477111000001100  | Captopril                      |
| Tensopril 25mg tablets                                        | 2928441000033115 | 2050501     | 597511000001109  | Captopril                      |
| Capoten 25mg tablets                                          | 214241000033118  | 2050501     | 455611000001103  | Captopril                      |
| Capoten 50mg tablets                                          | 214341000033111  | 2050501     | 386611000001109  | Captopril                      |

| Product name                                        | Product code     | BNF Chapter | Dm+D ID          | Drug substance                            |
|-----------------------------------------------------|------------------|-------------|------------------|-------------------------------------------|
| <i>Hypertension medication (continued)</i>          |                  |             |                  |                                           |
| Kaplon 50mg tablets                                 | 1622241000033119 | 2050501     | 572511000001102  | Captopril                                 |
| Acepril 50mg tablets                                | 11041000033117   | 2050501     | 814111000001108  | Captopril                                 |
| Ecopace 50mg tablets                                | 2946041000033114 | 2050501     | 767911000001101  | Captopril                                 |
| Tensopril 50mg tablets                              | 2928541000033119 | 2050501     | 653111000001108  | Captopril                                 |
| Captopril 50mg tablets                              | 214541000033116  | 2050501     | 318824000        | Captopril                                 |
| Enalapril 20mg / Hydrochlorothiazide 12.5mg tablets | 3162241000033117 | 2050501     | 318849001        | Enalapril maleate/<br>Hydrochlorothiazide |
| Innozide 20mg/12.5mg tablets                        | 770141000033115  | 2050501     | 146811000001108  | Enalapril maleate/<br>Hydrochlorothiazide |
| Pralenal 2.5 tablets                                | 1918641000033112 | 2050501     | 448611000001106  | Enalapril maleate                         |
| Innovace 2.5mg tablets                              | 769141000033117  | 2050501     | 749611000001107  | Enalapril maleate                         |
| Enalapril 2.5mg tablets                             | 523541000033115  | 2050501     | 318850001        | Enalapril maleate                         |
| Enalapril 5mg tablets                               | 522841000033111  | 2050501     | 318851002        | Enalapril maleate                         |
| Innovace 5mg tablets                                | 769341000033119  | 2050501     | 730211000001104  | Enalapril maleate                         |
| Pralenal 5 tablets                                  | 1918741000033115 | 2050501     | 578511000001100  | Enalapril maleate                         |
| Innovace 10mg tablets                               | 769041000033116  | 2050501     | 316111000001104  | Enalapril maleate                         |
| Pralenal 10 tablets                                 | 1918841000033113 | 2050501     | 761411000001101  | Enalapril maleate                         |
| Enalapril 10mg tablets                              | 522641000033110  | 2050501     | 318853004        | Enalapril maleate                         |
| Enalapril 20mg tablets                              | 522741000033118  | 2050501     | 318855006        | Enalapril maleate                         |
| Pralenal 20 tablets                                 | 1918941000033117 | 2050501     | 508511000001105  | Enalapril maleate                         |
| Innovace 20mg tablets                               | 769241000033112  | 2050501     | 302311000001104  | Enalapril maleate                         |
| Zestril 2.5mg tablets                               | 1552041000033115 | 2050501     | 593111000001108  | Lisinopril                                |
| Lisinopril 2.5mg tablets                            | 837941000033119  | 2050501     | 318857003        | Lisinopril                                |
| Lisinopril 5mg tablets                              | 838141000033117  | 2050501     | 318858008        | Lisinopril                                |
| Zestril 5mg tablets                                 | 1552241000033111 | 2050501     | 823211000001109  | Lisinopril                                |
| Zestril 10mg tablets                                | 1551941000033114 | 2050501     | 825311000001100  | Lisinopril                                |
| Lisinopril 10mg tablets                             | 837841000033110  | 2050501     | 318859000        | Lisinopril                                |
| Lisinopril 20mg tablets                             | 838041000033116  | 2050501     | 318860005        | Lisinopril                                |
| Zestril 20mg tablets                                | 1552141000033116 | 2050501     | 891711000001107  | Lisinopril                                |
| Zestoretic 20 tablets                               | 1552341000033118 | 2050501     | 3143111000001100 | Hydrochlorothiazide/ Lisinopril           |

| Product name                                         | Product code     | BNF Chapter | Dm+D ID          | Drug substance                               |
|------------------------------------------------------|------------------|-------------|------------------|----------------------------------------------|
| <i>Hypertension medication (continued)</i>           |                  |             |                  |                                              |
| Carace 20 Plus tablets                               | 217041000033116  | 2050501     | 3143511000001109 | Hydrochlorothiazide/ Lisinopril              |
| Lisicostad 20mg/12.5mg tablets                       | 3279641000033119 | 2050501     | 8145911000001100 | Hydrochlorothiazide/ Lisinopril              |
| Lisinopril 20mg / Hydrochlorothiazide 12.5mg tablets | 3160941000033113 | 2050501     | 318880006        | Hydrochlorothiazide/ Lisinopril              |
| Lisinopril 10mg / Hydrochlorothiazide 12.5mg tablets | 3160841000033117 | 2050501     | 318884002        | Hydrochlorothiazide/ Lisinopril              |
| Lisicostad 10mg/12.5mg tablets                       | 3279541000033115 | 2050501     | 8145711000001102 | Hydrochlorothiazide/ Lisinopril              |
| Zestoretic 10 tablets                                | 1551841000033118 | 2050501     | 3144311000001101 | Hydrochlorothiazide/ Lisinopril              |
| Carace 10 Plus tablets                               | 209841000033115  | 2050501     | 3144511000001107 | Hydrochlorothiazide/ Lisinopril              |
| Accupro 5mg tablets                                  | 13441000033110   | 2050501     | 582611000001106  | Quinapril hydrochloride                      |
| Quinapril 5mg tablets                                | 1149241000033111 | 2050501     | 318885001        | Quinapril hydrochloride                      |
| Quinapril 10mg tablets                               | 1149341000033118 | 2050501     | 318886000        | Quinapril hydrochloride                      |
| Accupro 10mg tablets                                 | 13241000033114   | 2050501     | 231111000001106  | Quinapril hydrochloride                      |
| Accupro 20mg tablets                                 | 13341000033116   | 2050501     | 829111000001100  | Quinapril hydrochloride                      |
| Quinapril 20mg tablets                               | 1149441000033112 | 2050501     | 318887009        | Quinapril hydrochloride                      |
| Quinapril 10mg / Hydrochlorothiazide 12.5mg tablets  | 3160641000033118 | 2050501     | 318892006        | Hydrochlorothiazide/ Quinapril hydrochloride |
| Accuretic 10mg/12.5mg tablets                        | 11241000033113   | 2050501     | 260211000001104  | Hydrochlorothiazide/ Quinapril hydrochloride |
| Accupro 40mg tablets                                 | 11641000033111   | 2050501     | 86411000001109   | Quinapril hydrochloride                      |
| Quinapril 40mg tablets                               | 1149541000033113 | 2050501     | 318894007        | Quinapril hydrochloride                      |
| Perindopril erbumine 2mg tablets                     | 1067841000033115 | 2050501     | 318896009        | Perindopril erbumine                         |
| Coversyl 2mg tablets                                 | 377541000033114  | 2050501     | 48211000001104   | Perindopril erbumine                         |
| Coversyl 4mg tablets                                 | 377641000033110  | 2050501     | 902211000001100  | Perindopril erbumine                         |
| Perindopril erbumine 4mg tablets                     | 1067941000033111 | 2050501     | 318897000        | Perindopril erbumine                         |
| Ramipril 1.25mg capsules                             | 1151341000033117 | 2050501     | 318900007        | Ramipril                                     |
| Tritace 1.25mg capsules                              | 1455541000033110 | 2050501     | 111611000001109  | Ramipril                                     |
| Tritace 2.5mg capsules                               | 1455641000033111 | 2050501     | 835411000001105  | Ramipril                                     |
| Lopace 2.5mg capsules                                | 3159741000033111 | 2050501     | 7948711000001102 | Ramipril                                     |
| Ramipril 2.5mg capsules                              | 1151441000033111 | 2050501     | 318901006        | Ramipril                                     |
| Ramipril 5mg capsules                                | 1151541000033112 | 2050501     | 318902004        | Ramipril                                     |

| Product name                               | Product code     | BNF Chapter | Dm+D ID          | Drug substance          |
|--------------------------------------------|------------------|-------------|------------------|-------------------------|
| <i>Hypertension medication (continued)</i> |                  |             |                  |                         |
| Lopace 5mg capsules                        | 3159841000033118 | 2050501     | 7948911000001100 | Ramipril                |
| Tritace 5mg capsules                       | 1455741000033119 | 2050501     | 802311000001101  | Ramipril                |
| Tritace 10mg capsules                      | 1769941000033115 | 2050501     | 43711000001100   | Ramipril                |
| Lopace 10mg capsules                       | 3159941000033114 | 2050501     | 7949111000001105 | Ramipril                |
| Ramipril 10mg capsules                     | 1769841000033111 | 2050501     | 318906001        | Ramipril                |
| Fosinopril 10mg tablets                    | 609141000033111  | 2050501     | 318909008        | Fosinopril sodium       |
| Fosinopril 20mg tablets                    | 609241000033116  | 2050501     | 318910003        | Fosinopril sodium       |
| Trandolapril 500microgram capsules         | 1454141000033119 | 2050501     | 318924004        | Trandolapril            |
| Trandolapril 1mg capsules                  | 1453941000033115 | 2050501     | 318925003        | Trandolapril            |
| Trandolapril 2mg capsules                  | 1454041000033118 | 2050501     | 318926002        | Trandolapril            |
| Perdix 7.5mg tablets                       | 1066041000033113 | 2050501     | 4041111000001109 | Moexipril hydrochloride |
| Moexipril 7.5mg tablets                    | 938141000033112  | 2050501     | 318934008        | Moexipril hydrochloride |
| Moexipril 15mg tablets                     | 938041000033113  | 2050501     | 318935009        | Moexipril hydrochloride |
| Perdix 15mg tablets                        | 1065941000033115 | 2050501     | 4040311000001101 | Moexipril hydrochloride |
| Tanatril 20mg tablets                      | 2145741000033116 | 2050501     | 533511000001106  | Imidapril hydrochloride |
| Imidapril 20mg tablets                     | 2145841000033114 | 2050501     | 318942009        | Imidapril hydrochloride |
| Imidapril 5mg tablets                      | 1739841000033119 | 2050501     | 318943004        | Imidapril hydrochloride |
| Tanatril 5mg tablets                       | 1753941000033114 | 2050501     | 797911000001103  | Imidapril hydrochloride |
| Tanatril 10mg tablets                      | 1753841000033118 | 2050501     | 680811000001102  | Imidapril hydrochloride |
| Imidapril 10mg tablets                     | 1739741000033112 | 2050501     | 318944005        | Imidapril hydrochloride |
| Perindopril erbumine 8mg tablets           | 2846741000033119 | 2050501     | 374667004        | Perindopril erbumine    |
| Coversyl 8mg tablets                       | 2846641000033111 | 2050501     | 3803711000001101 | Perindopril erbumine    |
| Ramipril 1.25mg tablets                    | 2989541000033115 | 2050501     | 408040007        | Ramipril                |
| Tritace 1.25mg tablets                     | 2989941000033114 | 2050501     | 5010511000001106 | Ramipril                |
| Tritace 2.5mg tablets                      | 2990041000033116 | 2050501     | 5010811000001109 | Ramipril                |
| Ramipril 2.5mg tablets                     | 2989641000033119 | 2050501     | 408050008        | Ramipril                |
| Ramipril 5mg tablets                       | 2989741000033111 | 2050501     | 408051007        | Ramipril                |
| Tritace 5mg tablets                        | 2990141000033117 | 2050501     | 5011111000001108 | Ramipril                |
| Tritace 10mg tablets                       | 2990241000033112 | 2050501     | 5011411000001103 | Ramipril                |



| Product name                                          | Product code     | BNF Chapter | Dm+D ID           | Drug substance                   |
|-------------------------------------------------------|------------------|-------------|-------------------|----------------------------------|
| <i>Hypertension medication (continued)</i>            |                  |             |                   |                                  |
| Ramipril 10mg tablets                                 | 2989841000033118 | 2050501     | 408052000         | Ramipril                         |
| Trandolapril 4mg capsules                             | 3014741000033111 | 2050501     | 410958005         | Trandolapril                     |
| Coversyl Plus tablets                                 | 2739541000033117 | 2050501     | 562511000001109   | Indapamide/ Perindopril erbumine |
| Perindopril erbumine 4mg / Indapamide 1.25mg tablets  | 3161641000033114 | 2050501     | 3437611000001100  | Indapamide/ Perindopril erbumine |
| Tritace titration pack capsules                       | 2724641000033119 | 2050501     | 3042211000001107  |                                  |
| Coversyl Arginine 10mg tablets                        | 4454441000033119 | 2050501     | 13444611000001109 | Perindopril arginine             |
| Perindopril arginine 10mg tablets                     | 4454141000033110 | 2050501     | 13454111000001103 | Perindopril arginine             |
| Perindopril arginine 2.5mg tablets                    | 4453941000033114 | 2050501     | 13454211000001109 | Perindopril arginine             |
| Coversyl Arginine 2.5mg tablets                       | 4454241000033115 | 2050501     | 13445211000001108 | Perindopril arginine             |
| Coversyl Arginine Plus 5mg/1.25mg tablets             | 4454641000033117 | 2050501     | 13444311000001104 | Indapamide/ Perindopril arginine |
| Perindopril arginine 5mg / Indapamide 1.25mg tablets  | 4454541000033118 | 2050501     | 13454311000001101 | Indapamide/ Perindopril arginine |
| Perindopril arginine 5mg tablets                      | 4454041000033111 | 2050501     | 13454411000001108 | Perindopril arginine             |
| Coversyl Arginine 5mg tablets                         | 4454341000033113 | 2050501     | 13444911000001103 | Perindopril arginine             |
| Noyada 25mg/5ml oral solution                         | 8961341000033119 | 2050501     | 23681711000001107 | Captopril                        |
| Captopril 25mg/5ml oral solution sugar free           | 9108041000033111 | 2050501     | 23707311000001108 | Captopril                        |
| Noyada 5mg/5ml oral solution                          | 8961241000033112 | 2050501     | 23682011000001102 | Captopril                        |
| Captopril 5mg/5ml oral solution sugar free            | 9108141000033110 | 2050501     | 23707511000001102 | Captopril                        |
| CoAprovel 300mg/12.5mg tablets                        | 2216241000033110 | 2050502     | 682711000001109   | Hydrochlorothiazide/ Irbesartan  |
| Irbesartan 300mg / Hydrochlorothiazide 12.5mg tablets | 3161241000033111 | 2050502     | 134460003         | Hydrochlorothiazide/ Irbesartan  |
| Irbesartan 150mg / Hydrochlorothiazide 12.5mg tablets | 3161141000033116 | 2050502     | 134461004         | Hydrochlorothiazide/ Irbesartan  |
| CoAprovel 150mg/12.5mg tablets                        | 2216141000033115 | 2050502     | 792411000001108   | Hydrochlorothiazide/ Irbesartan  |
| Micardis 20mg tablets                                 | 2272741000033111 | 2050502     | 648711000001100   | Telmisartan                      |
| Telmisartan 20mg tablets                              | 2272641000033119 | 2050502     | 134463001         | Telmisartan                      |
| Losartan 25mg tablets                                 | 851841000033117  | 2050502     | 318955005         | Losartan potassium               |
| Cozaar 25mg tablets                                   | 370441000033112  | 2050502     | 266511000001104   | Losartan potassium               |
| Cozaar 50mg tablets                                   | 370541000033113  | 2050502     | 53611000001106    | Losartan potassium               |

| Product name                                       | Product code     | BNF Chapter | Dm+D ID         | Drug substance                          |
|----------------------------------------------------|------------------|-------------|-----------------|-----------------------------------------|
| <i>Hypertension medication (continued)</i>         |                  |             |                 |                                         |
| Losartan 50mg tablets                              | 851941000033113  | 2050502     | 318956006       | Losartan potassium                      |
| Losartan 50mg / Hydrochlorothiazide 12.5mg tablets | 3161741000033117 | 2050502     | 318959004       | Hydrochlorothiazide/ Losartan potassium |
| Cozaar-Comp 50mg/12.5mg tablets                    | 370841000033110  | 2050502     | 255911000001105 | Hydrochlorothiazide/ Losartan potassium |
| Diovan 40mg capsules                               | 437741000033110  | 2050502     | 777611000001101 | Valsartan                               |
| Valsartan 40mg capsules                            | 1498341000033118 | 2050502     | 318961008       | Valsartan                               |
| Valsartan 80mg capsules                            | 1498441000033112 | 2050502     | 318962001       | Valsartan                               |
| Diovan 80mg capsules                               | 437841000033117  | 2050502     | 554511000001105 | Valsartan                               |
| Diovan 160mg capsules                              | 437641000033118  | 2050502     | 117011000001107 | Valsartan                               |
| Valsartan 160mg capsules                           | 1498241000033111 | 2050502     | 318963006       | Valsartan                               |
| Irbesartan 75mg tablets                            | 775641000033115  | 2050502     | 318968002       | Irbesartan                              |
| Aprovel 75mg tablets                               | 76141000033117   | 2050502     | 434511000001104 | Irbesartan                              |
| Aprovel 150mg tablets                              | 75941000033114   | 2050502     | 859711000001103 | Irbesartan                              |
| Irbesartan 150mg tablets                           | 775441000033117  | 2050502     | 318969005       | Irbesartan                              |
| Irbesartan 300mg tablets                           | 775541000033116  | 2050502     | 318970006       | Irbesartan                              |
| Aprovel 300mg tablets                              | 76041000033116   | 2050502     | 323211000001107 | Irbesartan                              |
| Amias 2mg tablets                                  | 59241000033118   | 2050502     | 97311000001103  | Candesartan cilexetil                   |
| Candesartan 2mg tablets                            | 211641000033118  | 2050502     | 318977009       | Candesartan cilexetil                   |
| Candesartan 4mg tablets                            | 211741000033110  | 2050502     | 318978004       | Candesartan cilexetil                   |
| Amias 4mg tablets                                  | 59341000033111   | 2050502     | 857411000001100 | Candesartan cilexetil                   |
| Amias 8mg tablets                                  | 59441000033117   | 2050502     | 36011000001106  | Candesartan cilexetil                   |
| Candesartan 8mg tablets                            | 211841000033117  | 2050502     | 318979007       | Candesartan cilexetil                   |
| Candesartan 16mg tablets                           | 211541000033119  | 2050502     | 318980005       | Candesartan cilexetil                   |
| Amias 16mg tablets                                 | 59141000033113   | 2050502     | 908511000001100 | Candesartan cilexetil                   |
| Micardis 40mg tablets                              | 1849741000033114 | 2050502     | 924911000001106 | Telmisartan                             |
| Telmisartan 40mg tablets                           | 1849541000033118 | 2050502     | 318986004       | Telmisartan                             |
| Telmisartan 80mg tablets                           | 1849641000033117 | 2050502     | 318987008       | Telmisartan                             |
| Micardis 80mg tablets                              | 1849841000033116 | 2050502     | 527411000001102 | Telmisartan                             |
| Teveten 300mg tablets                              | 2040841000033113 | 2050502     | 401211000001105 | Eprosartan mesilate                     |

| Product name                                                   | Product code     | BNF Chapter | Dm+D ID           | Drug substance                            |
|----------------------------------------------------------------|------------------|-------------|-------------------|-------------------------------------------|
| <i>Hypertension medication (continued)</i>                     |                  |             |                   |                                           |
| Eprosartan 300mg tablets                                       | 2036341000033115 | 2050502     | 318994006         | Eprosartan mesilate                       |
| Eprosartan 400mg tablets                                       | 2036441000033114 | 2050502     | 318995007         | Eprosartan mesilate                       |
| Teveten 400mg tablets                                          | 2040941000033117 | 2050502     | 151411000001103   | Eprosartan mesilate                       |
| Teveten 600mg tablets                                          | 2041041000033110 | 2050502     | 872011000001109   | Eprosartan mesilate                       |
| Eprosartan 600mg tablets                                       | 2036541000033110 | 2050502     | 318996008         | Eprosartan mesilate                       |
| Valsartan 80mg / Hydrochlorothiazide 12.5mg tablets            | 3190741000033112 | 2050502     | 377488008         | Hydrochlorothiazide/ Valsartan            |
| Co-Diovan 80mg/12.5mg tablets                                  | 3190841000033119 | 2050502     | 8150111000001108  | Hydrochlorothiazide/ Valsartan            |
| Olmesartan medoxomil 20mg tablets                              | 2944641000033112 | 2050502     | 385542009         | Olmesartan medoxomil                      |
| Olmetec 20mg tablets                                           | 2944941000033117 | 2050502     | 4624311000001103  | Olmesartan medoxomil                      |
| Olmetec 40mg tablets                                           | 2945041000033117 | 2050502     | 4624611000001108  | Olmesartan medoxomil                      |
| Olmesartan medoxomil 40mg tablets                              | 2944741000033115 | 2050502     | 385543004         | Olmesartan medoxomil                      |
| Valsartan 160mg / Hydrochlorothiazide 12.5mg tablets           | 3161441000033112 | 2050502     | 395521005         | Hydrochlorothiazide/ Valsartan            |
| Co-Diovan 160mg/12.5mg tablets                                 | 3152541000033112 | 2050502     | 7668611000001104  | Hydrochlorothiazide/ Valsartan            |
| Losartan 100mg tablets                                         | 2720141000033115 | 2050502     | 407784004         | Losartan potassium                        |
| Cozaar 100mg tablets                                           | 2720241000033110 | 2050502     | 245811000001102   | Losartan potassium                        |
| MicardisPlus 40mg/12.5mg tablets                               | 2864241000033110 | 2050502     | 3806311000001109  | Hydrochlorothiazide/ Telmisartan          |
| Telmisartan 40mg / Hydrochlorothiazide 12.5mg tablets          | 3162641000033119 | 2050502     | 407855002         | Hydrochlorothiazide/ Telmisartan          |
| Telmisartan 80mg / Hydrochlorothiazide 12.5mg tablets          | 3162741000033111 | 2050502     | 407856001         | Hydrochlorothiazide/ Telmisartan          |
| MicardisPlus 80mg/12.5mg tablets                               | 2864341000033117 | 2050502     | 3806911000001105  | Hydrochlorothiazide/ Telmisartan          |
| Olmesartan medoxomil 10mg tablets                              | 2944541000033111 | 2050502     | 408055003         | Olmesartan medoxomil                      |
| Olmetec 10mg tablets                                           | 2944841000033113 | 2050502     | 4624011000001101  | Olmesartan medoxomil                      |
| Olmetec Plus 20mg/12.5mg tablets                               | 3909141000033116 | 2050502     | 10261511000001103 | Hydrochlorothiazide/ Olmesartan medoxomil |
| Olmesartan medoxomil 20mg / Hydrochlorothiazide 12.5mg tablets | 3908941000033112 | 2050502     | 409184002         | Hydrochlorothiazide/ Olmesartan medoxomil |
| Valsartan 160mg / Hydrochlorothiazide 25mg tablets             | 3161541000033113 | 2050502     | 409298002         | Hydrochlorothiazide/ Valsartan            |
| Co-Diovan 160mg/25mg tablets                                   | 3152641000033113 | 2050502     | 7668911000001105  | Hydrochlorothiazide/ Valsartan            |
| Diovan 40mg tablets                                            | 3201441000033114 | 2050502     | 8263211000001101  | Valsartan                                 |

| Product name                                                 | Product code     | BNF Chapter | Dm+D ID           | Drug substance                                                 |
|--------------------------------------------------------------|------------------|-------------|-------------------|----------------------------------------------------------------|
| <i>Hypertension medication (continued)</i>                   |                  |             |                   |                                                                |
| Valsartan 40mg tablets                                       | 3201341000033115 | 2050502     | 416515008         | Valsartan                                                      |
| Sevikar 20mg/5mg tablets                                     | 5006141000033110 | 2050502     | 15773211000001105 | Amlodipine besilate/ Olmesartan medoxomil                      |
| Olmesartan medoxomil 20mg / Amlodipine 5mg tablets           | 5005841000033114 | 2050502     | 429502004         | Amlodipine besilate/ Olmesartan medoxomil                      |
| Olmesartan medoxomil 40mg / Amlodipine 5mg tablets           | 5005941000033118 | 2050502     | 429503009         | Amlodipine besilate/ Olmesartan medoxomil                      |
| Sevikar 40mg/5mg tablets                                     | 5006241000033115 | 2050502     | 15772911000001108 | Amlodipine besilate/ Olmesartan medoxomil                      |
| Sevikar 40mg/10mg tablets                                    | 5006341000033113 | 2050502     | 15772611000001102 | Amlodipine besilate/ Olmesartan medoxomil                      |
| Olmesartan medoxomil 40mg / Amlodipine 10mg tablets          | 5006041000033111 | 2050502     | 429678006         | Amlodipine besilate/ Olmesartan medoxomil                      |
| Edarbi 40mg tablets                                          | 7755241000033119 | 2050502     | 20351211000001103 | Azilsartan medoxomil                                           |
| Azilsartan medoxomil 40mg tablets                            | 7754941000033110 | 2050502     | 449109006         | Azilsartan medoxomil                                           |
| Azilsartan medoxomil 80mg tablets                            | 7755041000033110 | 2050502     | 449333009         | Azilsartan medoxomil                                           |
| Edarbi 80mg tablets                                          | 7755341000033112 | 2050502     | 20351811000001102 | Azilsartan medoxomil                                           |
| Olmesartan medoxomil 20mg / Hydrochlorothiazide 25mg tablets | 3909041000033115 | 2050502     | 10270711000001105 | Hydrochlorothiazide/ Olmesartan medoxomil                      |
| Olmotec Plus 20mg/25mg tablets                               | 3909241000033111 | 2050502     | 10261811000001100 | Hydrochlorothiazide/ Olmesartan medoxomil                      |
| Cozaar 2.5mg/ml oral suspension                              | 5150041000033110 | 2050502     | 15506811000001105 | Losartan potassium                                             |
| Losartan 2.5mg/ml oral suspension sugar free                 | 5149941000033118 | 2050502     | 15507411000001105 | Losartan potassium                                             |
| Sevikar HCT 20mg/5mg/12.5mg tablets                          | 6180641000033112 | 2050502     | 18986411000001108 | Amlodipine besilate/ Hydrochlorothiazide/ Olmesartan medoxomil |
| Sevikar HCT 40mg/10mg/12.5mg tablets                         | 6180841000033113 | 2050502     | 18987011000001101 | Amlodipine besilate/ Hydrochlorothiazide/ Olmesartan medoxomil |
| Sevikar HCT 40mg/10mg/25mg tablets                           | 6181041000033110 | 2050502     | 18987611000001108 | Amlodipine besilate/ Hydrochlorothiazide/ Olmesartan medoxomil |
| Sevikar HCT 40mg/5mg/12.5mg tablets                          | 6180741000033115 | 2050502     | 18986711000001102 | Amlodipine besilate/ Hydrochlorothiazide/ Olmesartan medoxomil |

| Product name                               | Product code      | BNF Chapter | Dm+D ID           | Drug substance                                                       |
|--------------------------------------------|-------------------|-------------|-------------------|----------------------------------------------------------------------|
| <i>Hypertension medication (continued)</i> |                   |             |                   |                                                                      |
| Sevikar HCT 40mg/5mg/25mg tablets          | 6180941000033117  | 2050502     | 18987311000001103 | Amlodipine besilate/<br>Hydrochlorothiazide/ Olmesartan<br>medoxomil |
| Edarbi 20mg tablets                        | 7755141000033114  | 2050502     | 20350911000001100 | Azilsartan medoxomil                                                 |
| Azilsartan medoxomil 20mg tablets          | 7754841000033119  | 2050502     | 20418711000001104 | Azilsartan medoxomil                                                 |
| Sacubitril 24mg / Valsartan 26mg tablets   | 10943641000033117 | 2050502     | 31142011000001103 | Sacubitril/ Valsartan                                                |
| Entresto 24mg/26mg tablets                 | 10943941000033112 | 2050502     | 31136811000001109 | Sacubitril/ Valsartan                                                |
| Entresto 49mg/51mg tablets                 | 10944041000033114 | 2050502     | 31136411000001107 | Sacubitril/ Valsartan                                                |
| Sacubitril 49mg / Valsartan 51mg tablets   | 10943741000033114 | 2050502     | 31142111000001102 | Sacubitril/ Valsartan                                                |
| Sacubitril 97mg / Valsartan 103mg tablets  | 10943841000033116 | 2050502     | 31142211000001108 | Sacubitril/ Valsartan                                                |
| Entresto 97mg/103mg tablets                | 10944141000033113 | 2050502     | 31138011000001104 | Sacubitril/ Valsartan                                                |
| Verapamil 40mg tablets                     | 1513241000033114  | 2060200     | 318204006         | Verapamil hydrochloride                                              |
| Cordilox 40mg tablets                      | 375041000033110   | 2060200     | 557111000001106   | Verapamil hydrochloride                                              |
| Cordilox 80mg tablets                      | 375141000033114   | 2060200     | 258911000001104   | Verapamil hydrochloride                                              |
| Verapamil 80mg tablets                     | 1513341000033116  | 2060200     | 318205007         | Verapamil hydrochloride                                              |
| Verapamil 120mg tablets                    | 1512941000033111  | 2060200     | 318206008         | Verapamil hydrochloride                                              |
| Vertab SR 240 tablets                      | 1754841000033116  | 2060200     | 675611000001104   | Verapamil hydrochloride                                              |
| Cordilox MR 240mg tablets                  | 2129041000033118  | 2060200     | 740811000001102   | Verapamil hydrochloride                                              |
| Securon SR 240mg tablets                   | 1275141000033117  | 2060200     | 540111000001108   | Verapamil hydrochloride                                              |
| Verapress MR 240mg tablets                 | 1833541000033117  | 2060200     | 525311000001101   | Verapamil hydrochloride                                              |
| Verapamil 240mg modified-release tablets   | 1509141000033115  | 2060200     | 318213008         | Verapamil hydrochloride                                              |
| Verapamil 160mg tablets                    | 1513141000033119  | 2060200     | 318248001         | Verapamil hydrochloride                                              |
| Cordilox 160mg tablets                     | 374941000033110   | 2060200     | 783511000001101   | Verapamil hydrochloride                                              |
| Univer 240mg modified-release capsules     | 1489741000033113  | 2060200     | 65411000001102    | Verapamil hydrochloride                                              |
| Verapamil 240mg modified-release capsules  | 1511341000033115  | 2060200     | 318250009         | Verapamil hydrochloride                                              |
| Angiozem CR 90mg tablets                   | 65941000033117    | 2060200     | 440711000001104   | Diltiazem hydrochloride                                              |
| Tildiem Retard 90mg tablets                | 1442841000033115  | 2060200     | 103611000001105   | Diltiazem hydrochloride                                              |
| Diltiazem 90mg modified-release tablets    | 458841000033115   | 2060200     | 319180004         | Diltiazem hydrochloride                                              |
| Diltiazem 300mg modified-release capsules  | 452041000033113   | 2060200     | 319181000         | Diltiazem hydrochloride                                              |

| Product name                               | Product code     | BNF Chapter | Dm+D ID          | Drug substance          |
|--------------------------------------------|------------------|-------------|------------------|-------------------------|
| <i>Hypertension medication (continued)</i> |                  |             |                  |                         |
| Disogram SR 300mg capsules                 | 2676041000033111 | 2060200     | 34711000001104   | Diltiazem hydrochloride |
| Viazem XL 300mg capsules                   | 1520441000033114 | 2060200     | 407011000001105  | Diltiazem hydrochloride |
| Slozem 300mg capsules                      | 2261241000033118 | 2060200     | 550211000001104  | Diltiazem hydrochloride |
| Angitil XL 300 capsules                    | 1570541000033111 | 2060200     | 467111000001105  | Diltiazem hydrochloride |
| Adizem-XL 300mg capsules                   | 18041000033112   | 2060200     | 2886111000001104 | Diltiazem hydrochloride |
| Zemtard 300 XL capsules                    | 1833341000033112 | 2060200     | 866811000001107  | Diltiazem hydrochloride |
| Tildiem LA 300 capsules                    | 1441741000033119 | 2060200     | 893111000001107  | Diltiazem hydrochloride |
| Angitil SR 90 capsules                     | 65341000033116   | 2060200     | 857011000001109  | Diltiazem hydrochloride |
| Adizem-SR 90mg capsules                    | 17641000033119   | 2060200     | 2887011000001102 | Diltiazem hydrochloride |
| Dilzem SR 90 capsules                      | 452741000033111  | 2060200     | 682311000001105  | Diltiazem hydrochloride |
| Dilcardia SR 90mg capsules                 | 1602541000033111 | 2060200     | 353011000001101  | Diltiazem hydrochloride |
| Disogram SR 90mg capsules                  | 2674941000033119 | 2060200     | 256611000001109  | Diltiazem hydrochloride |
| Diltiazem 90mg modified-release capsules   | 452141000033112  | 2060200     | 319182007        | Diltiazem hydrochloride |
| Diltiazem 120mg modified-release capsules  | 451841000033110  | 2060200     | 319183002        | Diltiazem hydrochloride |
| Dilzem XL 120 capsules                     | 453041000033116  | 2060200     | 243111000001108  | Diltiazem hydrochloride |
| Angitil SR 120 capsules                    | 65441000033110   | 2060200     | 298811000001103  | Diltiazem hydrochloride |
| Viazem XL 120mg capsules                   | 1520141000033118 | 2060200     | 32311000001105   | Diltiazem hydrochloride |
| Dilzem SR 120 capsules                     | 452841000033118  | 2060200     | 5711000001106    | Diltiazem hydrochloride |
| Disogram SR 120mg capsules                 | 2675041000033119 | 2060200     | 116711000001106  | Diltiazem hydrochloride |
| Zemtard 120 XL capsules                    | 1833041000033110 | 2060200     | 105211000001107  | Diltiazem hydrochloride |
| Slozem 120mg capsules                      | 1346441000033111 | 2060200     | 130211000001109  | Diltiazem hydrochloride |
| Dilcardia SR 120mg capsules                | 1602341000033116 | 2060200     | 723811000001107  | Diltiazem hydrochloride |
| Adizem-SR 120mg capsules                   | 17341000033110   | 2060200     | 2887311000001104 | Diltiazem hydrochloride |
| Adizem-XL 120mg capsules                   | 17741000033111   | 2060200     | 2937811000001108 | Diltiazem hydrochloride |
| Adizem-XL 180mg capsules                   | 17841000033118   | 2060200     | 2938011000001101 | Diltiazem hydrochloride |
| Adizem-SR 180mg capsules                   | 17441000033116   | 2060200     | 2886711000001103 | Diltiazem hydrochloride |
| Zemtard 180 XL capsules                    | 1833141000033114 | 2060200     | 813611000001103  | Diltiazem hydrochloride |
| Disogram SR 180mg capsules                 | 2675341000033117 | 2060200     | 713411000001103  | Diltiazem hydrochloride |

| Product name                               | Product code     | BNF Chapter | Dm+D ID          | Drug substance            |
|--------------------------------------------|------------------|-------------|------------------|---------------------------|
| <i>Hypertension medication (continued)</i> |                  |             |                  |                           |
| Angitil SR 180 capsules                    | 65541000033111   | 2060200     | 336611000001101  | Diltiazem hydrochloride   |
| Slozem 180mg capsules                      | 1346541000033112 | 2060200     | 119211000001108  | Diltiazem hydrochloride   |
| Viazem XL 180mg capsules                   | 1520241000033113 | 2060200     | 33211000001108   | Diltiazem hydrochloride   |
| Dilzem XL 180 capsules                     | 453141000033117  | 2060200     | 254911000001106  | Diltiazem hydrochloride   |
| Diltiazem 180mg modified-release capsules  | 451941000033119  | 2060200     | 319184008        | Diltiazem hydrochloride   |
| Diltiazem 60mg modified-release capsules   | 452941000033114  | 2060200     | 319185009        | Diltiazem hydrochloride   |
| Dilzem SR 60 capsules                      | 452641000033119  | 2060200     | 417111000001109  | Diltiazem hydrochloride   |
| Disogram SR 60mg capsules                  | 2674841000033110 | 2060200     | 469811000001106  | Diltiazem hydrochloride   |
| Dilcardia SR 60mg capsules                 | 1602441000033110 | 2060200     | 937011000001101  | Diltiazem hydrochloride   |
| Adizem-XL 240mg capsules                   | 17941000033114   | 2060200     | 2886311000001102 | Diltiazem hydrochloride   |
| Viazem XL 240mg capsules                   | 1520341000033115 | 2060200     | 886511000001107  | Diltiazem hydrochloride   |
| Dilzem XL 240 capsules                     | 453241000033112  | 2060200     | 733511000001107  | Diltiazem hydrochloride   |
| Slozem 240mg capsules                      | 1346641000033113 | 2060200     | 599811000001104  | Diltiazem hydrochloride   |
| Zemtard 240 XL capsules                    | 1833241000033119 | 2060200     | 345411000001107  | Diltiazem hydrochloride   |
| Angitil XL 240 capsules                    | 1570441000033110 | 2060200     | 75111000001104   | Diltiazem hydrochloride   |
| Disogram SR 240mg capsules                 | 2675641000033113 | 2060200     | 108711000001107  | Diltiazem hydrochloride   |
| Diltiazem 240mg modified-release capsules  | 453741000033118  | 2060200     | 319186005        | Diltiazem hydrochloride   |
| Diltiazem 200mg modified-release capsules  | 453941000033115  | 2060200     | 319187001        | Diltiazem hydrochloride   |
| Tildiem LA 200 capsules                    | 1441841000033112 | 2060200     | 261611000001107  | Diltiazem hydrochloride   |
| Adizem-XL 200mg capsules                   | 2653341000033118 | 2060200     | 2886511000001108 | Diltiazem hydrochloride   |
| Viazem XL 360mg capsules                   | 1520541000033110 | 2060200     | 648211000001107  | Diltiazem hydrochloride   |
| Diltiazem 360mg modified-release capsules  | 1800341000033113 | 2060200     | 319198000        | Diltiazem hydrochloride   |
| Diltiazem 60mg modified-release tablets    | 454041000033118  | 2060200     | 319205001        | Diltiazem hydrochloride   |
| Tildiem 60mg modified-release tablets      | 1443841000033113 | 2060200     | 762011000001102  | Diltiazem hydrochloride   |
| Optil 60mg modified-release tablets        | 1661641000033116 | 2060200     | 527711000001108  | Diltiazem hydrochloride   |
| Cardene SR 45mg capsules                   | 199041000033110  | 2060200     | 118811000001102  | Nicardipine hydrochloride |
| Nicardipine 45mg modified-release capsules | 971541000033113  | 2060200     | 319215007        | Nicardipine hydrochloride |

| Product name                               | Product code     | BNF Chapter | Dm+D ID          | Drug substance            |
|--------------------------------------------|------------------|-------------|------------------|---------------------------|
| <i>Hypertension medication (continued)</i> |                  |             |                  |                           |
| Nicardipine 30mg modified-release capsules | 971441000033112  | 2060200     | 319216008        | Nicardipine hydrochloride |
| Cardene SR 30mg capsules                   | 198941000033118  | 2060200     | 540311000001105  | Nicardipine hydrochloride |
| Cardene 20mg capsules                      | 176741000033114  | 2060200     | 344811000001108  | Nicardipine hydrochloride |
| Nicardipine 20mg capsules                  | 967741000033115  | 2060200     | 319217004        | Nicardipine hydrochloride |
| Nicardipine 30mg capsules                  | 967141000033119  | 2060200     | 319218009        | Nicardipine hydrochloride |
| Cardene 30mg capsules                      | 176841000033116  | 2060200     | 291111000001102  | Nicardipine hydrochloride |
| Adalat 5mg capsules                        | 14141000033116   | 2060200     | 27111000001107   | Nifedipine                |
| Nifedipine 5mg capsules                    | 967341000033116  | 2060200     | 319222004        | Nifedipine                |
| Nifedipine 10mg capsules                   | 967241000033114  | 2060200     | 319223009        | Nifedipine                |
| Adalat 10mg capsules                       | 14041000033115   | 2060200     | 782511000001108  | Nifedipine                |
| Fortipine LA 40 tablets                    | 605941000033110  | 2060200     | 188711000001108  | Nifedipine                |
| Nifedipine 40mg modified-release tablets   | 972441000033116  | 2060200     | 319233001        | Nifedipine                |
| Nifedipine 30mg modified-release capsules  | 1778741000033118 | 2060200     | 319247002        | Nifedipine                |
| Coracten XL 30mg capsules                  | 1724941000033113 | 2060200     | 162811000001100  | Nifedipine                |
| Coracten XL 60mg capsules                  | 1725041000033113 | 2060200     | 3381511000001105 | Nifedipine                |
| Nifedipine 60mg modified-release capsules  | 1778841000033111 | 2060200     | 319248007        | Nifedipine                |
| Nifedipine 10mg modified-release capsules  | 971141000033116  | 2060200     | 319272002        | Nifedipine                |
| Coracten SR 10mg capsules                  | 336641000033114  | 2060200     | 126411000001108  | Nifedipine                |
| Coracten SR 20mg capsules                  | 364241000033112  | 2060200     | 389611000001101  | Nifedipine                |
| Nifedipine 20mg modified-release capsules  | 974141000033119  | 2060200     | 319273007        | Nifedipine                |
| Nifedipine 10mg modified-release tablets   | 971841000033110  | 2060200     | 319274001        | Nifedipine                |
| Tensipine MR 10 tablets                    | 1421241000033110 | 2060200     | 413111000001101  | Nifedipine                |
| Adalat retard 10mg tablets                 | 19441000033113   | 2060200     | 569011000001108  | Nifedipine                |
| Adipine MR 10 tablets                      | 18341000033114   | 2060200     | 833611000001109  | Nifedipine                |
| Nifedipress MR 10 tablets                  | 1745041000033110 | 2060200     | 904011000001104  | Nifedipine                |
| Adalat LA 30mg tablets                     | 17141000033112   | 2060200     | 2881311000001105 | Nifedipine                |
| Adipine XL 30mg tablets                    | 3225441000033117 | 2060200     | 9049711000001108 | Nifedipine                |



| Product name                               | Product code     | BNF Chapter | Dm+D ID           | Drug substance |
|--------------------------------------------|------------------|-------------|-------------------|----------------|
| <i>Hypertension medication (continued)</i> |                  |             |                   |                |
| Nifedipine 30mg modified-release tablets   | 971241000033111  | 2060200     | 319275000         | Nifedipine     |
| Valni XL 30mg tablets                      | 4451941000033110 | 2060200     | 13401911000001109 | Nifedipine     |
| Valni XL 60mg tablets                      | 4452041000033116 | 2060200     | 13402111000001101 | Nifedipine     |
| Nifedipine 60mg modified-release tablets   | 971341000033118  | 2060200     | 319276004         | Nifedipine     |
| Adipine XL 60mg tablets                    | 3225541000033116 | 2060200     | 9049911000001105  | Nifedipine     |
| Adalat LA 60mg tablets                     | 17241000033117   | 2060200     | 235511000001104   | Nifedipine     |
| Tensipine MR 20 tablets                    | 1421341000033117 | 2060200     | 385611000001104   | Nifedipine     |
| Adalat retard 20mg tablets                 | 19341000033119   | 2060200     | 5011000001109     | Nifedipine     |
| Adipine MR 20 tablets                      | 18241000033116   | 2060200     | 74111000001103    | Nifedipine     |
| Adalat LA 20mg tablets                     | 1766341000033113 | 2060200     | 881811000001100   | Nifedipine     |
| Nifedipine 20mg modified-release tablets   | 970941000033113  | 2060200     | 319277008         | Nifedipine     |
| Isradipine 2.5mg tablets                   | 784641000033112  | 2060200     | 319280009         | Isradipine     |
| Istin 5mg tablets                          | 787941000033112  | 2060200     | 172711000001100   | Amlodipine     |
| Amlostin 5mg tablets                       | 3188741000033111 | 2060200     | 8046211000001107  | Amlodipine     |
| Amlodipine 5mg tablets                     | 3038041000033111 | 2060200     | 319283006         | Amlodipine     |
| Amlodipine 10mg tablets                    | 3038141000033110 | 2060200     | 319284000         | Amlodipine     |
| Amlostin 10mg tablets                      | 3188841000033118 | 2060200     | 8046411000001106  | Amlodipine     |
| Istin 10mg tablets                         | 788041000033110  | 2060200     | 408111000001107   | Amlodipine     |
| Plendil 5mg modified-release tablets       | 1094141000033115 | 2060200     | 490211000001101   | Felodipine     |
| Felogen XL 5mg tablets                     | 3177441000033110 | 2060200     | 4972811000001103  | Felodipine     |
| Felotens XL 5mg tablets                    | 2979941000033119 | 2060200     | 4785111000001103  | Felodipine     |
| Vascalpha 5mg modified-release tablets     | 3034341000033117 | 2060200     | 5638311000001102  | Felodipine     |
| Neofel XL 5mg tablets                      | 4521641000033114 | 2060200     | 8090111000001106  | Felodipine     |
| Cardiopen XL 5mg tablets                   | 3154841000033119 | 2060200     | 7887011000001104  | Felodipine     |
| Felodipine 5mg modified-release tablets    | 569141000033116  | 2060200     | 319287007         | Felodipine     |
| Felodipine 10mg modified-release tablets   | 569041000033115  | 2060200     | 319288002         | Felodipine     |
| Cardiopen XL 10mg tablets                  | 3154941000033110 | 2060200     | 7887511000001107  | Felodipine     |
| Neofel XL 10mg tablets                     | 4521741000033117 | 2060200     | 8089811000001107  | Felodipine     |
| Vascalpha 10mg modified-release tablets    | 3034441000033111 | 2060200     | 5638811000001106  | Felodipine     |

| Product name                                         | Product code     | BNF Chapter | Dm+D ID           | Drug substance                 |
|------------------------------------------------------|------------------|-------------|-------------------|--------------------------------|
| <i>Hypertension medication (continued)</i>           |                  |             |                   |                                |
| Felotens XL 10mg tablets                             | 2980041000033115 | 2060200     | 4785511000001107  | Felodipine                     |
| Felogen XL 10mg tablets                              | 3177541000033111 | 2060200     | 4973011000001100  | Felodipine                     |
| Plendil 10mg modified-release tablets                | 1094041000033119 | 2060200     | 48511000001101    | Felodipine                     |
| Plendil 2.5mg modified-release tablets               | 1093941000033116 | 2060200     | 562711000001104   | Felodipine                     |
| Felodipine 2.5mg modified-release tablets            | 568041000033111  | 2060200     | 319291002         | Felodipine                     |
| Felotens XL 2.5mg tablets                            | 4429241000033115 | 2060200     | 13127311000001107 | Felodipine                     |
| Lacidipine 2mg tablets                               | 817541000033119  | 2060200     | 319300008         | Lacidipine                     |
| Motens 2mg tablets                                   | 937041000033114  | 2060200     | 910911000001108   | Lacidipine                     |
| Motens 4mg tablets                                   | 937141000033113  | 2060200     | 333011000001100   | Lacidipine                     |
| Lacidipine 4mg tablets                               | 817641000033118  | 2060200     | 319301007         | Lacidipine                     |
| Lercanidipine 10mg tablets                           | 825941000033112  | 2060200     | 319316005         | Lercanidipine hydrochloride    |
| Zanidip 10mg tablets                                 | 1550841000033111 | 2060200     | 20011000001105    | Lercanidipine hydrochloride    |
| Nimotop 30mg tablets                                 | 977741000033114  | 2060200     | 3879211000001104  | Nimodipine                     |
| Nimodipine 30mg tablets                              | 977441000033119  | 2060200     | 323273000         | Nimodipine                     |
| Diltiazem 120mg modified-release tablets             | 459641000033113  | 2060200     | 418945005         | Diltiazem hydrochloride        |
| Angiozem CR 120mg tablets                            | 66041000033110   | 2060200     | 144811000001101   | Diltiazem hydrochloride        |
| Tildiem Retard 120mg tablets                         | 1442741000033113 | 2060200     | 383911000001109   | Diltiazem hydrochloride        |
| Adizem-SR 120mg tablets                              | 19641000033110   | 2060200     | 2885611000001102  | Diltiazem hydrochloride        |
| Verapamil 40mg/5ml oral solution sugar free          | 1509841000033114 | 2060200     | 4139411000001106  | Verapamil hydrochloride        |
| Zolvera 40mg/5ml oral solution                       | 2641041000033116 | 2060200     | 4129511000001107  | Verapamil hydrochloride        |
| Amlodipine 10mg / Valsartan 160mg tablets            | 4021641000033111 | 2060200     | 11160111000001107 | Amlodipine besilate/ Valsartan |
| Exforge 10mg/160mg tablets                           | 4021941000033116 | 2060200     | 11160711000001108 | Amlodipine besilate/ Valsartan |
| Exforge 5mg/160mg tablets                            | 4021841000033112 | 2060200     | 11161511000001105 | Amlodipine besilate/ Valsartan |
| Amlodipine 5mg / Valsartan 160mg tablets             | 4021541000033110 | 2060200     | 11160211000001101 | Amlodipine besilate/ Valsartan |
| Amlodipine 5mg / Valsartan 80mg tablets              | 4021441000033114 | 2060200     | 11160311000001109 | Amlodipine besilate/ Valsartan |
| Exforge 5mg/80mg tablets                             | 4021741000033119 | 2060200     | 11161811000001108 | Amlodipine besilate/ Valsartan |
| Nicardipine 10mg/10ml solution for infusion ampoules | 9697741000033114 | 2060200     | 27126711000001103 | Nicardipine hydrochloride      |

| Product name                                       | Product code      | BNF Chapter | Dm+D ID           | Drug substance          |
|----------------------------------------------------|-------------------|-------------|-------------------|-------------------------|
| <i>Hypertension medication (continued)</i>         |                   |             |                   |                         |
| Clevidipine 25mg/50ml emulsion for infusion vials  | 11072441000033111 | 2060200     | 32046911000001105 | Clevidipine             |
| Cleviprex 25mg/50ml emulsion for infusion vials    | 11072541000033112 | 2060200     | 32047111000001105 | Clevidipine             |
| Half Securon SR 120mg tablets                      | 660641000033112   | 2060200     | 846611000001102   | Verapamil hydrochloride |
| Verapamil 120mg modified-release tablets           | 1509041000033119  | 2060200     | 35367911000001103 | Verapamil hydrochloride |
| Nimotop 0.02% solution for infusion 50ml vials     | 970841000033117   | 2060200     | 4387211000001100  | Nimodipine              |
| Nimodipine 10mg/50ml solution for infusion vials   | 970741000033110   | 2060200     | 36031711000001104 | Nimodipine              |
| Univer 180mg modified-release capsules             | 1489641000033116  | 2060200     | 391811000001102   | Verapamil hydrochloride |
| Verapamil 180mg modified-release capsules          | 1511241000033113  | 2060200     | 36149411000001103 | Verapamil hydrochloride |
| Securon IV 5mg/2ml solution for injection ampoules | 1271741000033116  | 2060200     | 4399811000001108  | Verapamil hydrochloride |
| Verapamil 5mg/2ml solution for injection ampoules  | 4260341000033110  | 2060200     | 36149611000001100 | Verapamil hydrochloride |
| Univer 120mg modified-release capsules             | 1489541000033117  | 2060200     | 219711000001103   | Verapamil hydrochloride |
| Verapamil 120mg modified-release capsules          | 1511141000033118  | 2060200     | 36565011000001105 | Verapamil hydrochloride |
| <i>Lipid-lowering medication</i>                   |                   |             |                   |                         |
| Lipobay 800microgram tablets                       | 2290141000033116  | 2120000     | 4568511000001103  | Cerivastatin sodium     |
| Cerivastatin 800microgram tablets                  | 2290041000033115  | 2120000     | 134491009         | Cerivastatin sodium     |
| Ranzolont 10mg tablets                             | 3140841000033113  | 2120000     | 7630211000001106  | Simvastatin             |
| Ranzolont 20mg tablets                             | 3140941000033117  | 2120000     | 7631911000001109  | Simvastatin             |
| Ranzolont 40mg tablets                             | 3141041000033110  | 2120000     | 7632811000001108  | Simvastatin             |
| Modalim 100mg tablets                              | 936941000033113   | 2120000     | 16207911000001106 | Ciprofibrate            |
| Lipobay 100microgram tablets                       | 836641000033111   | 2120000     | 4535911000001106  | Cerivastatin sodium     |
| Cerivastatin 100microgram tablets                  | 233741000033115   | 2120000     | 320035006         | Cerivastatin sodium     |
| Cerivastatin 200microgram tablets                  | 233841000033113   | 2120000     | 320036007         | Cerivastatin sodium     |
| Lipobay 200microgram tablets                       | 836741000033119   | 2120000     | 4537511000001108  | Cerivastatin sodium     |
| Lipobay 300microgram tablets                       | 836841000033112   | 2120000     | 4566311000001105  | Cerivastatin sodium     |
| Cerivastatin 300microgram tablets                  | 233941000033117   | 2120000     | 320037003         | Cerivastatin sodium     |

| Product name                                    | Product code      | BNF Chapter | Dm+D ID           | Drug substance                  |
|-------------------------------------------------|-------------------|-------------|-------------------|---------------------------------|
| <i>Lipid-lowering medication (continued)</i>    |                   |             |                   |                                 |
| Cerivastatin 400microgram tablets               | 1916841000033114  | 2120000     | 320041004         | Cerivastatin sodium             |
| Lipobay 400microgram tablets                    | 1916741000033116  | 2120000     | 4538111000001103  | Cerivastatin sodium             |
| Rosuvastatin 5mg tablets                        | 3836041000033114  | 2120000     | 409108001         | Rosuvastatin calcium            |
| Crestor 5mg tablets                             | 3836141000033113  | 2120000     | 9747511000001107  | Rosuvastatin calcium            |
| Simvastatin 20mg/5ml oral suspension            | 3304141000033110  | 2120000     | 8722111000001104  | Simvastatin                     |
| Simvastatin 20mg/5ml oral solution              | 5888441000033115  | 2120000     | 13894211000001107 | Simvastatin                     |
| Simvastatin 40mg/5ml oral solution              | 5888541000033119  | 2120000     | 13894311000001104 | Simvastatin                     |
| Simvastatin 40mg/5ml oral suspension            | 4152341000033115  | 2120000     | 13894411000001106 | Simvastatin                     |
| Atorvastatin 20mg/5ml oral solution             | 5990541000033112  | 2120000     | 14018211000001101 | Atorvastatin calcium trihydrate |
| Atorvastatin 20mg/5ml oral suspension           | 3868741000033118  | 2120000     | 14018311000001109 | Atorvastatin calcium trihydrate |
| Atorvastatin 10mg/5ml oral solution             | 5897841000033117  | 2120000     | 14158611000001100 | Atorvastatin calcium trihydrate |
| Atorvastatin 10mg/5ml oral suspension           | 5897741000033110  | 2120000     | 14158711000001109 | Atorvastatin calcium trihydrate |
| Pravastatin 5mg/5ml oral solution               | 8493841000033111  | 2120000     | 14957711000001105 | Pravastatin sodium              |
| Pravastatin 5mg/5ml oral suspension             | 10618641000033118 | 2120000     | 14957811000001102 | Pravastatin sodium              |
| Pravastatin 40mg/5ml oral suspension            | 5711041000033117  | 2120000     | 15534511000001107 | Pravastatin sodium              |
| Simvastatin 20mg/5ml oral suspension sugar free | 5817741000033114  | 2120000     | 17369311000001105 | Simvastatin                     |
| Simvastatin 40mg/5ml oral suspension sugar free | 5817841000033116  | 2120000     | 17429811000001102 | Simvastatin                     |
| Atorvastatin 30mg tablets                       | 7861441000033110  | 2120000     | 20528511000001106 | Atorvastatin calcium trihydrate |
| Atorvastatin 60mg tablets                       | 7861541000033111  | 2120000     | 20528611000001105 | Atorvastatin calcium trihydrate |
| Luvinsta XL 80mg tablets                        | 5007141000033112  | 2120000     | 15364211000001102 | Fluvastatin sodium              |
| Dorisin XL 80mg tablets                         | 5711841000033112  | 2120000     | 17282011000001107 | Fluvastatin sodium              |
| Stefluvin XL 80mg tablets                       | 5808641000033119  | 2120000     | 17332011000001106 | Fluvastatin sodium              |
| Pinmactil 80mg modified-release tablets         | 5560541000033119  | 2120000     | 16735311000001101 | Fluvastatin sodium              |
| Cadaff XL 80mg tablets                          | 12987241000033111 | 2120000     | 36836411000001100 | Fluvastatin sodium              |
| Nandovar XL 80mg tablets                        | 8962441000033117  | 2120000     | 23864311000001100 | Fluvastatin sodium              |
| Atorvastatin 80mg tablets                       | 2261041000033114  | 2120000     | 134489001         | Atorvastatin calcium trihydrate |
| Lipitor 80mg tablets                            | 2261141000033113  | 2120000     | 756111000001109   | Atorvastatin calcium trihydrate |
| Simvastatin 10mg tablets                        | 1336841000033110  | 2120000     | 319996000         | Simvastatin                     |

| Product name                                 | Product code     | BNF Chapter | Dm+D ID           | Drug substance                  |
|----------------------------------------------|------------------|-------------|-------------------|---------------------------------|
| <i>Lipid-lowering medication (continued)</i> |                  |             |                   |                                 |
| Zocor 10mg tablets                           | 1562841000033119 | 2120000     | 108111000001106   | Simvastatin                     |
| Simvador 10mg tablets                        | 2973941000033116 | 2120000     | 4896211000001101  | Simvastatin                     |
| Simvador 20mg tablets                        | 2974041000033119 | 2120000     | 4896511000001103  | Simvastatin                     |
| Zocor 20mg tablets                           | 1562941000033110 | 2120000     | 776811000001104   | Simvastatin                     |
| Simvastatin 20mg tablets                     | 1336941000033119 | 2120000     | 319997009         | Simvastatin                     |
| Simvastatin 40mg tablets                     | 1337541000033111 | 2120000     | 320000009         | Simvastatin                     |
| Zocor 40mg tablets                           | 1562241000033118 | 2120000     | 859611000001107   | Simvastatin                     |
| Simvador 40mg tablets                        | 2974141000033115 | 2120000     | 4896711000001108  | Simvastatin                     |
| Zocor 80mg tablets                           | 2066341000033111 | 2120000     | 113211000001106   | Simvastatin                     |
| Simvastatin 80mg tablets                     | 2066241000033118 | 2120000     | 320006003         | Simvastatin                     |
| Simvador 80mg tablets                        | 4941641000033116 | 2120000     | 15158611000001106 | Simvastatin                     |
| Pravastatin 10mg tablets                     | 1130141000033111 | 2120000     | 320012008         | Pravastatin sodium              |
| Lipostat 10mg tablets                        | 834841000033118  | 2120000     | 802411000001108   | Pravastatin sodium              |
| Lipostat 20mg tablets                        | 834941000033114  | 2120000     | 454111000001107   | Pravastatin sodium              |
| Pravastatin 20mg tablets                     | 1130241000033116 | 2120000     | 320013003         | Pravastatin sodium              |
| Pravastatin 40mg tablets                     | 1136541000033116 | 2120000     | 320014009         | Pravastatin sodium              |
| Lipostat 40mg tablets                        | 836541000033110  | 2120000     | 535011000001102   | Pravastatin sodium              |
| Fluvastatin 20mg capsules                    | 578641000033114  | 2120000     | 320022002         | Fluvastatin sodium              |
| Lescol 20mg capsules                         | 819941000033119  | 2120000     | 84811000001104    | Fluvastatin sodium              |
| Lescol 40mg capsules                         | 820041000033116  | 2120000     | 409611000001108   | Fluvastatin sodium              |
| Fluvastatin 40mg capsules                    | 578741000033117  | 2120000     | 320023007         | Fluvastatin sodium              |
| Atorvastatin 10mg tablets                    | 91941000033117   | 2120000     | 320029006         | Atorvastatin calcium trihydrate |
| Lipitor 10mg tablets                         | 836241000033113  | 2120000     | 643911000001108   | Atorvastatin calcium trihydrate |
| Lipitor 20mg tablets                         | 836341000033115  | 2120000     | 232011000001102   | Atorvastatin calcium trihydrate |
| Atorvastatin 20mg tablets                    | 92041000033111   | 2120000     | 320030001         | Atorvastatin calcium trihydrate |
| Atorvastatin 40mg tablets                    | 92141000033110   | 2120000     | 320031002         | Atorvastatin calcium trihydrate |
| Lipitor 40mg tablets                         | 836441000033114  | 2120000     | 484211000001108   | Atorvastatin calcium trihydrate |
| Crestor 40mg tablets                         | 2892041000033111 | 2120000     | 4172111000001108  | Rosuvastatin calcium            |
| Rosuvastatin 40mg tablets                    | 2891741000033115 | 2120000     | 408024009         | Rosuvastatin calcium            |

| Product name                                  | Product code      | BNF Chapter | Dm+D ID           | Drug substance                  |
|-----------------------------------------------|-------------------|-------------|-------------------|---------------------------------|
| <i>Lipid-lowering medication (continued)</i>  |                   |             |                   |                                 |
| Crestor 10mg tablets                          | 2891841000033113  | 2120000     | 4171011000001104  | Rosuvastatin calcium            |
| Rosuvastatin 10mg tablets                     | 2891541000033111  | 2120000     | 408036003         | Rosuvastatin calcium            |
| Rosuvastatin 20mg tablets                     | 2891641000033112  | 2120000     | 408037007         | Rosuvastatin calcium            |
| Crestor 20mg tablets                          | 2891941000033117  | 2120000     | 4171311000001101  | Rosuvastatin calcium            |
| Ezetrol 10mg tablets                          | 2906841000033112  | 2120000     | 4495611000001102  | Ezetimibe                       |
| Ezetimibe 10mg tablets                        | 2906741000033119  | 2120000     | 408060004         | Ezetimibe                       |
| Simvastatin 20mg / Ezetimibe 10mg tablets     | 3292441000033116  | 2120000     | 414177002         | Ezetimibe/ Simvastatin          |
| Inegy 10mg/20mg tablets                       | 3292741000033111  | 2120000     | 9309911000001100  | Ezetimibe/ Simvastatin          |
| Inegy 10mg/40mg tablets                       | 3292841000033118  | 2120000     | 9310311000001108  | Ezetimibe/ Simvastatin          |
| Simvastatin 40mg / Ezetimibe 10mg tablets     | 3292541000033115  | 2120000     | 414178007         | Ezetimibe/ Simvastatin          |
| Simvastatin 80mg / Ezetimibe 10mg tablets     | 3292641000033119  | 2120000     | 414179004         | Ezetimibe/ Simvastatin          |
| Inegy 10mg/80mg tablets                       | 3292941000033114  | 2120000     | 9310611000001103  | Ezetimibe/ Simvastatin          |
| Lipitor 10mg chewable tablets                 | 6469041000033110  | 2120000     | 19719311000001104 | Atorvastatin calcium trihydrate |
| Atorvastatin 10mg chewable tablets sugar free | 6468641000033113  | 2120000     | 19722411000001106 | Atorvastatin calcium trihydrate |
| Atorvastatin 20mg chewable tablets sugar free | 6468841000033114  | 2120000     | 19722511000001105 | Atorvastatin calcium trihydrate |
| Lipitor 20mg chewable tablets                 | 6469141000033114  | 2120000     | 19719611000001109 | Atorvastatin calcium trihydrate |
| Cholib 145mg/20mg tablets                     | 11241941000033116 | 2120000     | 32170911000001100 | Fenofibrate/ Simvastatin        |
| Fenofibrate 145mg / Simvastatin 20mg tablets  | 11241741000033119 | 2120000     | 32234211000001101 | Fenofibrate/ Simvastatin        |
| Fenofibrate 145mg / Simvastatin 40mg tablets  | 11241841000033112 | 2120000     | 32234311000001109 | Fenofibrate/ Simvastatin        |
| Cholib 145mg/40mg tablets                     | 11242041000033110 | 2120000     | 32169911000001103 | Fenofibrate/ Simvastatin        |
| Lescol XL 80mg tablets                        | 2189141000033114  | 2120000     | 378111000001106   | Fluvastatin sodium              |
| Fluvastatin 80mg modified-release tablets     | 2189041000033110  | 2120000     | 36566411000001105 | Fluvastatin sodium              |
| Bezafibrate 200mg tablets                     | 145841000033113   | 2120000     | 319940007         | Bezafibrate                     |
| Bezalip 200mg tablets                         | 144941000033118   | 2120000     | 130711000001102   | Bezafibrate                     |
| Bezalip Mono 400mg modified-release tablets   | 145041000033118   | 2120000     | 349711000001104   | Bezafibrate                     |

| Product name                                                      | Product code     | BNF Chapter | Dm+D ID           | Drug substance                                 |
|-------------------------------------------------------------------|------------------|-------------|-------------------|------------------------------------------------|
| <i>Lipid-lowering medication (continued)</i>                      |                  |             |                   |                                                |
| Zimbalcol XL 400mg tablets                                        | 2192041000033117 | 2120000     | 880511000001105   | Bezafibrate                                    |
| Bezafibrate 400mg modified-release tablets                        | 145941000033117  | 2120000     | 319941006         | Bezafibrate                                    |
| Colestyramine 4g oral powder sachets                              | 3086341000033118 | 2120000     | 319948000         | Colestyramine anhydrous                        |
| Questran 4g oral powder sachets                                   | 1148741000033114 | 2120000     | 3257311000001105  | Colestyramine anhydrous                        |
| Lopid 600mg tablets                                               | 851541000033119  | 2120000     | 389111000001109   | Gemfibrozil                                    |
| Gemfibrozil 600mg tablets                                         | 634541000033110  | 2120000     | 319964008         | Gemfibrozil                                    |
| Gemfibrozil 300mg capsules                                        | 627841000033118  | 2120000     | 319966005         | Gemfibrozil                                    |
| Lopid 300mg capsules                                              | 838941000033115  | 2120000     | 383511000001102   | Gemfibrozil                                    |
| Nicotinic acid 50mg tablets                                       | 974841000033113  | 2120000     | 319971003         | Nicotinic acid                                 |
| Eicosapentaenoic acid 170mg / Docosahexaenoic acid 115mg capsules | 3281941000033115 | 2120000     | 319978009         | Docosahexaenoic acid/<br>Eicosapentaenoic acid |
| MaxEPA 1g capsules                                                | 858241000033113  | 2120000     | 2838911000001109  | Docosahexaenoic acid/<br>Eicosapentaenoic acid |
| Olbetam 250mg capsules                                            | 1003341000033117 | 2120000     | 3698311000001102  | Acipimox                                       |
| Acipimox 250mg capsules                                           | 2841000033117    | 2120000     | 319984007         | Acipimox                                       |
| Fenofibrate micronised 200mg capsules                             | 3188941000033114 | 2120000     | 319988005         | Fenofibrate micronised                         |
| Lipantil Micro 200 capsules                                       | 1862741000033111 | 2120000     | 2952311000001100  | Fenofibrate micronised                         |
| Lipantil Micro 67 capsules                                        | 836941000033116  | 2120000     | 2957011000001101  | Fenofibrate micronised                         |
| Fenofibrate micronised 67mg capsules                              | 564641000033113  | 2120000     | 319990006         | Fenofibrate micronised                         |
| Fenofibrate micronised 267mg capsules                             | 1862541000033115 | 2120000     | 319992003         | Fenofibrate micronised                         |
| Lipantil Micro 267 capsules                                       | 1862641000033119 | 2120000     | 2957911000001102  | Fenofibrate micronised                         |
| Supralip 160mg tablets                                            | 2214841000033115 | 2120000     | 2950911000001103  | Fenofibrate micronised                         |
| Fenofibrate micronised 160mg tablets                              | 2214741000033113 | 2120000     | 319994002         | Fenofibrate micronised                         |
| Ciprofibrate 100mg tablets                                        | 258541000033118  | 2120000     | 320018007         | Ciprofibrate                                   |
| Colesevelam 625mg tablets                                         | 4310841000033113 | 2120000     | 376119006         | Colesevelam hydrochloride                      |
| Cholestagel 625mg tablets                                         | 4310941000033117 | 2120000     | 12556311000001105 | Colesevelam hydrochloride                      |
| Questran Light 4g oral powder sachets                             | 1148841000033116 | 2120000     | 3263311000001105  | Colestyramine anhydrous                        |
| Colestyramine 4g oral powder sachets sugar free                   | 3086441000033112 | 2120000     | 3336411000001107  | Colestyramine anhydrous                        |
| Colestid 5g granules sachets plain                                | 328341000033119  | 2120000     | 4083011000001103  | Colestipol hydrochloride                       |

| Product name                                                                 | Product code      | BNF Chapter | Dm+D ID           | Drug substance                                 |
|------------------------------------------------------------------------------|-------------------|-------------|-------------------|------------------------------------------------|
| <i>Lipid-lowering medication (continued)</i>                                 |                   |             |                   |                                                |
| Colestid Orange 5g granules sachets                                          | 359441000033119   | 2120000     | 4083711000001101  | Colestipol hydrochloride                       |
| Colestipol 5g granules sachets sugar free                                    | 328141000033117   | 2120000     | 4090511000001101  | Colestipol hydrochloride                       |
| Omacor capsules                                                              | 2762241000033115  | 2120000     | 4334511000001103  | Docosahexaenoic acid/<br>Eicosapentaenoic acid |
| Eicosapentaenoic acid 460mg /<br>Docosahexaenoic acid 380mg capsules         | 3282141000033113  | 2120000     | 4339911000001106  | Docosahexaenoic acid/<br>Eicosapentaenoic acid |
| Prestylon 1g capsules                                                        | 8275241000033118  | 2120000     | 22024211000001105 | Docosahexaenoic acid/<br>Eicosapentaenoic acid |
| Niaspan titration pack                                                       | 2994641000033116  | 2120000     | 4995011000001107  | NA                                             |
| Fenogal 200mg capsules                                                       | 2801141000033116  | 2120000     | 9835611000001100  | Fenofibrate                                    |
| Fenofibrate 200mg capsules                                                   | 564541000033112   | 2120000     | 9843611000001100  | Fenofibrate                                    |
| Lomitapide 10mg capsules                                                     | 8886241000033114  | 2120000     | 23604411000001100 | Lomitapide                                     |
| Lojuxta 10mg capsules                                                        | 8886541000033111  | 2120000     | 23495011000001109 | Lomitapide                                     |
| Lojuxta 20mg capsules                                                        | 8886641000033112  | 2120000     | 23496011000001100 | Lomitapide                                     |
| Lomitapide 20mg capsules                                                     | 8886341000033116  | 2120000     | 23604511000001101 | Lomitapide                                     |
| Lomitapide 5mg capsules                                                      | 8886141000033119  | 2120000     | 23604611000001102 | Lomitapide                                     |
| Lojuxta 5mg capsules                                                         | 8886441000033110  | 2120000     | 23494411000001101 | Lomitapide                                     |
| Evolocumab 140mg/1ml solution for<br>injection pre-filled disposable devices | 10618041000033112 | 2120000     | 30738011000001103 | Evolocumab                                     |
| Repatha SureClick 140mg/1ml solution for<br>injection pre-filled pens        | 10618141000033111 | 2120000     | 30663811000001102 | Evolocumab                                     |
| Repatha 140mg/1ml solution for injection<br>pre-filled syringes              | 10617941000033114 | 2120000     | 30664511000001102 | Evolocumab                                     |
| Evolocumab 140mg/1ml solution for<br>injection pre-filled syringes           | 10617841000033118 | 2120000     | 30738111000001102 | Evolocumab                                     |
| Alirocumab 150mg/1ml solution for<br>injection pre-filled disposable devices | 10647141000033116 | 2120000     | 30919211000001103 | Alirocumab                                     |
| Praluent 150mg/1ml solution for injection<br>pre-filled pens                 | 10647341000033118 | 2120000     | 30841911000001106 | Alirocumab                                     |
| Praluent 75mg/1ml solution for injection<br>pre-filled pens                  | 10647241000033111 | 2120000     | 30840811000001109 | Alirocumab                                     |
| Alirocumab 75mg/1ml solution for injection<br>pre-filled disposable devices  | 10647041000033115 | 2120000     | 30919311000001106 | Alirocumab                                     |
| Niaspan 1g modified-release tablets                                          | 2994441000033118  | 2120000     | 4994211000001103  | Nicotinic acid                                 |
| Nicotinic acid 1g modified-release tablets                                   | 2994141000033114  | 2120000     | 36031411000001105 | Nicotinic acid                                 |



| Product name                                                                | Product code     | BNF Chapter | Dm+D ID           | Drug substance                                 |
|-----------------------------------------------------------------------------|------------------|-------------|-------------------|------------------------------------------------|
| <i>Lipid-lowering medication (continued)</i>                                |                  |             |                   |                                                |
| Niaspan 500mg modified-release tablets                                      | 2994241000033119 | 2120000     | 4993311000001109  | Nicotinic acid                                 |
| Nicotinic acid 500mg modified-release tablets                               | 2849841000033117 | 2120000     | 36031511000001109 | Nicotinic acid                                 |
| Niaspan 750mg modified-release tablets                                      | 2994341000033112 | 2120000     | 4993911000001105  | Nicotinic acid                                 |
| Nicotinic acid 750mg modified-release tablets                               | 2994041000033110 | 2120000     | 36031611000001108 | Nicotinic acid                                 |
| MaxEPA liquid                                                               | 863241000033112  | 2120000     | 279311000001109   | Docosahexaenoic acid/<br>Eicosapentaenoic acid |
| Eicosapentaenoic acid 170mg/g /<br>Docosahexaenoic acid 115mg/g oral liquid | 3282041000033114 | 2120000     | 36071811000001105 | Docosahexaenoic acid/<br>Eicosapentaenoic acid |
| <i>Anti-obesity medication</i>                                              |                  |             |                   |                                                |
| Ispaghula husk 3.5g effervescent granules sachets gluten free sugar free    | 2721841000033116 | 1060100     | 404179005         | Ispaghula husk                                 |
| Fybogel Orange 3.5g effervescent granules sachets SF                        | 619941000033111  | 1060100     | 3256311000001107  | Ispaghula husk                                 |
| Fybogel Lemon 3.5g effervescent granules sachets SF                         | 620041000033114  | 1060100     | 3256711000001106  | Ispaghula husk                                 |
| Ispagel Orange 3.5g effervescent granules sachets                           | 2667341000033118 | 1060100     | 3253111000001100  | Ispaghula husk                                 |
| Fybogel 3.5g effervescent granules sachets plain SF                         | 2721141000033110 | 1060100     | 3254111000001103  | Ispaghula husk                                 |
| Ispaghula husk 3.4g oral powder sachets gluten free sugar free              | 4574741000033119 | 1060100     | 3476811000001101  | Ispaghula husk                                 |
| Regulan 3.4g oral powder sachets orange                                     | 1163541000033117 | 1060100     | 3255611000001107  | Ispaghula husk                                 |
| Regulan 3.4g oral powder sachets lemon & lime                               | 1163441000033118 | 1060100     | 3258711000001105  | Ispaghula husk                                 |
| Sterculia 62% / Frangula 8% granules gluten free                            | 2174541000033114 | 1060100     | 3505411000001105  | Frangula/ Sterculia                            |
| Normacol Plus granules                                                      | 980841000033114  | 1060100     | 132511000001108   | Frangula/ Sterculia                            |
| Normacol Plus granules 7g sachets                                           | 984141000033112  | 1060100     | 236711000001101   | Frangula/ Sterculia                            |
| Sterculia 62% / Frangula 8% granules 7g sachets gluten free                 | 2174641000033110 | 1060100     | 3505511000001109  | Frangula/ Sterculia                            |
| Sterculia 62% granules gluten free                                          | 328041000033116  | 1060100     | 3505711000001104  | Sterculia                                      |
| Normacol granules                                                           | 980441000033111  | 1060100     | 590511000001105   | Sterculia                                      |
| Sterculia 62% granules 7g sachets gluten free                               | 2148241000033116 | 1060100     | 3505811000001107  | Sterculia                                      |
| Normacol granules 7g sachets                                                | 2148141000033111 | 1060100     | 832311000001109   | Sterculia                                      |

| Product name                                     | Product code     | BNF Chapter | Dm+D ID          | Drug substance      |
|--------------------------------------------------|------------------|-------------|------------------|---------------------|
| <i>Anti-obesity medication (continued)</i>       |                  |             |                  |                     |
| Fybogel Orange 3.5g effervescent granules        | 2746741000033116 | 1060100     | 3772111000001104 | Ispaghula husk      |
| Ispaghula husk 3.5g granules sachets gluten free | 4574541000033110 | 1060100     | 9306111000001106 | Ispaghula husk      |
| Methylcellulose 500mg tablets                    | 897241000033117  | 4050100     | 317499007        | Methylcellulose 450 |
| Celevac 500mg tablets                            | 234541000033113  | 4050100     | 797011000001102  | Methylcellulose 450 |
| Orlistat 120mg capsules                          | 1661741000033113 | 4050100     | 317893003        | Orlistat            |
| Xenical 120mg capsules                           | 1711941000033117 | 4050100     | 460711000001105  | Orlistat            |

**Table S5. CPRD codes for lifestyle support.**

| Term                                                         | CPRD code         | Read code | Snomed concept ID | Intervention type             | Intervention category |
|--------------------------------------------------------------|-------------------|-----------|-------------------|-------------------------------|-----------------------|
| Blood pressure leaflet given                                 | 283030010         | 8CE3.00   | 183100002         | Signposting/Advice            | Blood pressure        |
| Lifestyle advice regarding hypertension                      | 1131851000000118  | 67H8.00   | 443402002         | Signposting/Advice            | Blood pressure        |
| Provision of written information about diabetes & hypertensn | 1946681000006112  | 8OAH.11   | 715759002         | Signposting/Advice            | Blood pressure        |
| Provision of written information about diabetes and high BP  | 1946691000006110  | 8OAH.00   | 715759002         | Signposting/Advice            | Blood pressure        |
| Patient advised about low salt diet                          | 12452351000006113 | NA        | 183063000         | Signposting/Advice            | Blood pressure        |
| Pt advised re low salt diet                                  | 918341000006115   | NA        | 918341000006104   | Signposting/Advice            | Blood pressure        |
| Pt advised re low salt diet                                  | 200191000006114   | 8CA4800   | 183063000         | Signposting/Advice            | Blood pressure        |
| Hypertension self-management plan agreed                     | 2117971000000119  | 661M600   | 812021000000106   | Intervention on-site/off-site | Blood pressure        |
| Hypertension self-management plan review                     | 2115801000000110  | 661N600   | 810981000000107   | Intervention on-site/off-site | Blood pressure        |
| Lifestyle education regarding hypertension                   | 7276911000006114  | NA        | 443402002         | Intervention on-site/off-site | Blood pressure        |
| Restricted salt diet                                         | 6458251000006118  | NA        | 386619000         | Intervention on-site/off-site | Blood pressure        |
| Low salt diet education                                      | 4719841000006116  | NA        | 183063000         | Intervention on-site/off-site | Blood pressure        |
| Patient advised about low cholesterol diet                   | 12452811000006116 | NA        | 183062005         | Signposting/Advice            | Cholesterol           |
| Patient advised re low cholesterol diet                      | 918351000006118   | NA        | 918351000006102   | Signposting/Advice            | Cholesterol           |
| Patient advised re low cholesterol diet                      | 240871000006110   | 8CA4700   | 183062005         | Signposting/Advice            | Cholesterol           |
| Provsn written information about diabetes & high cholesterol | 1946711000006113  | 8OAK.00   | 715879000         | Signposting/Advice            | Cholesterol           |
| Cholesterol reduction program - invited                      | 6004011000006116  | NA        | 310879007         | Intervention on-site/off-site | Cholesterol           |
| Cholesterol reduction programme - invited                    | 454400014         | 8BAG000   | 310879007         | Intervention on-site/off-site | Cholesterol           |
| Cholesterol-lowering diet                                    | 4534341000006117  | NA        | 160672004         | Intervention on-site/off-site | Cholesterol           |
| Low cholesterol diet                                         | 250451013         | 13B3.00   | 160672004         | Intervention on-site/off-site | Cholesterol           |
| Low cholesterol diet education                               | 4719821000006111  | NA        | 183062005         | Intervention on-site/off-site | Cholesterol           |

| Term                                             | CPRD code         | Read code | Snomed concept ID | Intervention type                        | Intervention category |
|--------------------------------------------------|-------------------|-----------|-------------------|------------------------------------------|-----------------------|
| [V]Dietary surveillance in hypercholesterolaemia | 1216379016        | ZV65317   | 804641000000101   | Intervention on-site/off-site            | Cholesterol           |
| Cholesterol reduction program                    | 6003941000006119  | NA        | 310876000         | Intervention on-site/off-site            | Cholesterol           |
| Cholesterol reduction program - attended         | 454402018         | 8BAG100   | 310880005         | Intervention on-site/off-site            | Cholesterol           |
| Cholesterol reduction program - attended         | 11923601000006114 | NA        | 310880005         | Intervention on-site/off-site            | Cholesterol           |
| Cholesterol reduction programme                  | 454394012         | 8BAG.00   | 310876000         | Intervention on-site/off-site            | Cholesterol           |
| Cholesterol reduction programme - attended       | 6004021000006112  | NA        | 310880005         | Intervention on-site/off-site            | Cholesterol           |
| Cholesterol reduction program - declined         | 454405016         | 8BAG200   | 182981008         | Intervention on-site/off-site (declined) | Cholesterol           |
| Cholesterol reduction program declined           | 11998181000006110 | NA        | 182981008         | Intervention on-site/off-site (declined) | Cholesterol           |
| Cholesterol reduction programme declined         | 11998171000006112 | NA        | 182981008         | Intervention on-site/off-site (declined) | Cholesterol           |
| Cholesterol reduction programme refused          | 11998201000006111 | NA        | 182981008         | Intervention on-site/off-site (declined) | Cholesterol           |
| Advice about diet                                | 2688161000006119  | NA        | 11816003          | Signposting/Advice                       | Diet                  |
| Advice about food intake                         | 1714271000000112  | 67lp.00   | 768111000000102   | Signposting/Advice                       | Diet                  |
| Advice on diet                                   | 2688171000006114  | NA        | 11816003          | Signposting/Advice                       | Diet                  |
| Lifestyle advice regarding diet                  | 1131791000000118  | 67H7.00   | 443288003         | Signposting/Advice                       | Diet                  |
| Diet leaflet given                               | 283031014         | 8CE4.00   | 183101003         | Signposting/Advice                       | Diet                  |
| Dietary advice given                             | 854971000006115   | NA        | 854971000006104   | Signposting/Advice                       | Diet                  |
| Dietetic goal - provide supportive advice        | 1911001000006112  | NA        | 1911001000006108  | Signposting/Advice                       | Diet                  |
| Patient advised about low carbohydrate diet      | 12452281000006110 | NA        | 183065007         | Signposting/Advice                       | Diet                  |
| Pt advis re low carbohydrate diet                | 918371000006111   | NA        | 918371000006107   | Signposting/Advice                       | Diet                  |
| Pt advis-low carbohydrate diet                   | 200081000006110   | 8CA4A00   | 183065007         | Signposting/Advice                       | Diet                  |
| Pt advised re diet NOS                           | 200121000006112   | 8CA4z00   | 11816003          | Signposting/Advice                       | Diet                  |
| Pt advised re low fat diet                       | 918331000006113   | NA        | 918331000006109   | Signposting/Advice                       | Diet                  |
| Pt advised re low fat diet                       | 200161000006118   | 8CA4600   | 183061003         | Signposting/Advice                       | Diet                  |
| Pt advised re sugar free diet                    | 200211000006110   | 8CA4911   | 281085002         | Signposting/Advice                       | Diet                  |
| Healthy eating advice                            | 2283791000000112  | 8CA4Q11   | 699849008         | Signposting/Advice                       | Diet                  |

| Term                                                    | CPRD code        | Read code | Snomed concept ID | Intervention type             | Intervention category |
|---------------------------------------------------------|------------------|-----------|-------------------|-------------------------------|-----------------------|
| Dietary management education, guidance, and counseling  | 7032301000006119 | NA        | 424753004         | Intervention on-site/off-site | Diet                  |
| Dietary management education, guidance, and counselling | 7032291000006115 | NA        | 424753004         | Intervention on-site/off-site | Diet                  |
| Dietary management teaching, guidance and counseling    | 7032321000006112 | NA        | 424753004         | Intervention on-site/off-site | Diet                  |
| Sugar-free diet education                               | 5647201000006115 | NA        | 281085002         | Intervention on-site/off-site | Diet                  |
| [V]Dietary surveillance and counselling                 | 461037012        | ZV65300   | 424753004         | Intervention on-site/off-site | Diet                  |
| Psycho-education - dietary                              | 1806291000006113 | NA        | 1806291000006109  | Intervention on-site/off-site | Diet                  |
| CHO - Low carbohydrate diet                             | 3582041000006118 | NA        | 66539004          | Intervention on-site/off-site | Diet                  |
| Health ed. - diet                                       | 818011000006113  | 6799      | 11816003          | Intervention on-site/off-site | Diet                  |
| Health ed. - diet                                       | 923601000006110  | NA        | 923601000006106   | Intervention on-site/off-site | Diet                  |
| Health education - nutrition                            | 2579417016       | 679Q.00   | 61310001          | Intervention on-site/off-site | Diet                  |
| Healthy eating education                                | 2283781000000110 | 8CA4Q00   | 699849008         | Intervention on-site/off-site | Diet                  |
| Lifestyle education regarding diet                      | 7275101000006116 | NA        | 443288003         | Intervention on-site/off-site | Diet                  |
| Low carbohydrate diet                                   | 500459011        | 13B5.00   | 66539004          | Intervention on-site/off-site | Diet                  |
| Low carbohydrate diet - prophylaxis                     | 4718981000006113 | NA        | 182955009         | Intervention on-site/off-site | Diet                  |
| Low carbohydrate diet -prophyl                          | 734811000006118  | 8B91.00   | 182955009         | Intervention on-site/off-site | Diet                  |
| Low carbohydrate diet education                         | 4719861000006117 | NA        | 183065007         | Intervention on-site/off-site | Diet                  |
| Low fat diet education                                  | 4719801000006118 | NA        | 183061003         | Intervention on-site/off-site | Diet                  |
| Nutrition education                                     | 3496161000006114 | NA        | 61310001          | Intervention on-site/off-site | Diet                  |
| Community Dietician Referral                            | 1574721000006116 | NA        | 1574721000006100  | Intervention on-site/off-site | Diet                  |
| Dietician                                               | 247867015        | 03K1.00   | 159033005         | Intervention on-site/off-site | Diet                  |
| Dietitian                                               | 4518171000006113 | NA        | 159033005         | Intervention on-site/off-site | Diet                  |

| Term                                         | CPRD code        | Read code | Snomed concept ID | Intervention type                        | Intervention category |
|----------------------------------------------|------------------|-----------|-------------------|------------------------------------------|-----------------------|
| In-house dietetics first appointment         | 404641000000110  | 9NJh.00   | 247311000000102   | Intervention on-site/off-site            | Diet                  |
| In-house dietetics follow-up appointment     | 404681000000119  | 9NJj.00   | 247331000000105   | Intervention on-site/off-site            | Diet                  |
| Patient referral to dietitian                | 4095601000006118 | NA        | 103699006         | Intervention on-site/off-site            | Diet                  |
| Reason for referral: Nutrition and Dietetics | 1776861000006112 | NA        | 1776861000006108  | Intervention on-site/off-site            | Diet                  |
| Refer to dietician                           | 1219016011       | 8H76.00   | 103699006         | Intervention on-site/off-site            | Diet                  |
| Refer to dietitian                           | 4095621000006111 | NA        | 103699006         | Intervention on-site/off-site            | Diet                  |
| Nutritional therapy                          | 2235141000000110 | 8CJ5.00   | 386373004         | Intervention on-site/off-site            | Diet                  |
| Referral to community dietician              | 2214201000000110 | 8H76000   | 306353006         | Intervention on-site/off-site            | Diet                  |
| Referral to community dietitian              | 5955121000006113 | NA        | 306353006         | Intervention on-site/off-site            | Diet                  |
| Referral to community-based dietitian        | 5955111000006117 | NA        | 306353006         | Intervention on-site/off-site            | Diet                  |
| Referral to hospital dietitian               | 1863491000006117 | NA        | 306354000         | Intervention on-site/off-site            | Diet                  |
| Referral to hospital-based dietitian         | 5955141000006118 | NA        | 306354000         | Intervention on-site/off-site            | Diet                  |
| Referred to Nutrition and Dietetics Service  | 1775491000006113 | NA        | 1775491000006109  | Intervention on-site/off-site            | Diet                  |
| Seen by dietician                            | 285287012        | 9N27.00   | 185284002         | Intervention on-site/off-site            | Diet                  |
| Seen by dietitian                            | 4734201000006114 | NA        | 185284002         | Intervention on-site/off-site            | Diet                  |
| Seen in dietician clinic                     | 285155016        | 9N0H.00   | 185176006         | Intervention on-site/off-site            | Diet                  |
| Discharge from dietetics service             | 449720017        | 8HgL.00   | 306626002         | Intervention on-site/off-site            | Diet                  |
| In-house dietetics discharge appointment     | 404661000000111  | 9Nji.00   | 247321000000108   | Intervention on-site/off-site            | Diet                  |
| Dietetics intervention declined              | 2312481000000119 | 8IEx.00   | 898971000000109   | Intervention on-site/off-site (declined) | Diet                  |
| Referral to dietician declined               | 216191012        | 8I3A.00   | 134385008         | Intervention on-site/off-site (declined) | Diet                  |
| Lifestyle advice                             | 923331000006112  | NA        | 923331000006108   | Signposting/Advice                       | General               |

| Term                                                                     | CPRD code         | Read code | Snomed concept ID | Intervention type                        | Intervention category |
|--------------------------------------------------------------------------|-------------------|-----------|-------------------|------------------------------------------|-----------------------|
| Lifestyle advice                                                         | 856861000006113   | NA        | 856861000006109   | Signposting/Advice                       | General               |
| Lifestyle advice pack given                                              | 1990821000006116  | NA        | 1990821000006100  | Signposting/Advice                       | General               |
| Lifestyle screening                                                      | 338241019         | 68a..00   | 225060009         | Signposting/Advice                       | General               |
| Healthy lifestyle programme offered                                      | 2364711000000112  | 9m44.00   | 921361000000105   | Intervention on-site/off-site            | General               |
| Healthy lifestyle programme offered                                      | 1897591000006111  | NA        | 1897591000006107  | Intervention on-site/off-site            | General               |
| Healthy lifestyle programme commenced                                    | 743171000000110   | 9m40.00   | 377531000000108   | Intervention on-site/off-site            | General               |
| Healthy lifestyle programme completed                                    | 743351000000116   | 9m42.00   | 377621000000107   | Intervention on-site/off-site            | General               |
| Healthy lifestyle programme status                                       | 1705001000006119  | 9m4..00   | 377501000000102   | Intervention on-site/off-site            | General               |
| Healthy lifestyle programme status                                       | 12716081000006119 | NA        | 377501000000102   | Intervention on-site/off-site            | General               |
| Referral to healthy lifestyle programme                                  | 1880041000006111  | NA        | 1880041000006107  | Intervention on-site/off-site            | General               |
| Referral to healthy lifestyle programme                                  | 2297611000000117  | 8Hlu.00   | 892281000000101   | Intervention on-site/off-site            | General               |
| Referred to Public Health and Lifestyle Service                          | 1775551000006118  | NA        | 1775551000006102  | Intervention on-site/off-site            | General               |
| Health education - cardiovascular disease                                | 557011000000110   | 679W.00   | 429785003         | Intervention on-site/off-site            | General               |
| Lifestyle counselling                                                    | 923821000006118   | NA        | 923821000006102   | Intervention on-site/off-site            | General               |
| Lifestyle counselling                                                    | 457062019         | 67H..00   | 313204009         | Intervention on-site/off-site            | General               |
| Lifestyle counselling                                                    | 856831000006116   | NA        | 856831000006100   | Intervention on-site/off-site            | General               |
| Lifestyle counselling                                                    | 12488261000006110 | NA        | 313204009         | Intervention on-site/off-site            | General               |
| Lifestyle education                                                      | 6027361000006116  | NA        | 313204009         | Intervention on-site/off-site            | General               |
| DNA (did not attend) cardiovascular disease primary prevention programme | 8124991000006119  | NA        | 382201000000105   | Intervention on-site/off-site (declined) | General               |
| DNA cardiovascular disease primary prevention programme                  | 1705111000006117  | 9NiN.00   | 382201000000105   | Intervention on-site/off-site (declined) | General               |
| Healthy lifestyle programme declined                                     | 743411000000112   | 9m43.00   | 377651000000102   | Intervention on-site/off-site (declined) | General               |

| Term                                                         | CPRD code        | Read code | Snomed concept ID | Intervention type                        | Intervention category |
|--------------------------------------------------------------|------------------|-----------|-------------------|------------------------------------------|-----------------------|
| Healthy lifestyle programme not completed                    | 743291000000116  | 9m41.00   | 377591000000109   | Intervention on-site/off-site (declined) | General               |
| Physical activity opportunity signposted                     | 1174931000000116 | 8Cd4.00   | 526371000000102   | Signposting/Advice                       | Physical activity     |
| Signposting to community exercise group                      | 2714461000000119 | NA        | 1083201000000102  | Signposting/Advice                       | Physical activity     |
| Advice about exercise                                        | 5929971000006113 | NA        | 304507003         | Signposting/Advice                       | Physical activity     |
| Advice aim for 30 min of mod act on 5 days or more each week | 1590481000006111 | 8CAm.00   | 286321000000102   | Signposting/Advice                       | Physical activity     |
| Brief intervention for physical activity offered             | 1166711000000112 | 9Oq5.00   | 522471000000109   | Signposting/Advice                       | Physical activity     |
| Lifestyle advice regarding exercise                          | 936021000006118  | 67H2.00   | 304507003         | Signposting/Advice                       | Physical activity     |
| Patient advised re exercise                                  | 240861000006115  | 8CA5.00   | 183073003         | Signposting/Advice                       | Physical activity     |
| Patient advised re exercise                                  | 918521000006117  | NA        | 918521000006101   | Signposting/Advice                       | Physical activity     |
| Referral for physical activity service offered               | 1709601000000118 | 9NS0100   | 767621000000102   | Intervention on-site/off-site            | Physical activity     |
| Brief intervention for physical activity completed           | 1705541000006112 | 9Oq3.00   | 375031000000109   | Intervention on-site/off-site            | Physical activity     |
| Brief intervention for physical activity follow-up completed | 1173291000000113 | 9Oq6.00   | 525601000000105   | Intervention on-site/off-site            | Physical activity     |
| Education about chair based exercise programme               | 2347341000000110 | 8CA5200   | 913431000000101   | Intervention on-site/off-site            | Physical activity     |
| Health ed. - exercise                                        | 923641000006112  | NA        | 923641000006108   | Intervention on-site/off-site            | Physical activity     |
| Health ed. - exercise                                        | 818031000006119  | 6798      | 304507003         | Intervention on-site/off-site            | Physical activity     |
| Exercise on prescription                                     | 454407012        | 8BAH.00   | 310882002         | Intervention on-site/off-site            | Physical activity     |
| Group exercise program                                       | 6649531000006117 | NA        | 401167006         | Intervention on-site/off-site            | Physical activity     |
| Group exercise programme                                     | 1773561018       | 8E7A.00   | 401167006         | Intervention on-site/off-site            | Physical activity     |
| Home exercise program                                        | 4989031000006114 | NA        | 229075007         | Intervention on-site/off-site            | Physical activity     |
| Home exercise programme                                      | 343410018        | 8E79.00   | 229075007         | Intervention on-site/off-site            | Physical activity     |
| Referral for exercise therapy                                | 1484897012       | 8H7q.00   | 390864007         | Intervention on-site/off-site            | Physical activity     |
| Referral to exercise on referral programme                   | 1174481000000114 | 8HkX.00   | 526151000000109   | Intervention on-site/off-site            | Physical activity     |



| Term                                                                                                                                              | CPRD code        | Read code | Snomed concept ID | Intervention type                        | Intervention category |
|---------------------------------------------------------------------------------------------------------------------------------------------------|------------------|-----------|-------------------|------------------------------------------|-----------------------|
| Referral to physical activity program                                                                                                             | 6516041000006114 | NA        | 390893007         | Intervention on-site/off-site            | Physical activity     |
| Referral to physical activity programme                                                                                                           | 1476247014       | 8H7s.00   | 390893007         | Intervention on-site/off-site            | Physical activity     |
| Referred for exercise program                                                                                                                     | 6900171000006111 | NA        | 416974006         | Intervention on-site/off-site            | Physical activity     |
| Referred for exercise programme                                                                                                                   | 2549517012       | 8HHc.00   | 416974006         | Intervention on-site/off-site            | Physical activity     |
| Brief intervention for physical activity declined                                                                                                 | 1662511000000117 | 8IAv.00   | 755541000000109   | Intervention on-site/off-site (declined) | Physical activity     |
| Declined referral to physical exercise programme                                                                                                  | 301331000000117  | 138S.00   | 199351000000104   | Intervention on-site/off-site (declined) | Physical activity     |
| Referral for exercise on prescription declined                                                                                                    | 1138611000000114 | 8IAZ.00   | 511991000000101   | Intervention on-site/off-site (declined) | Physical activity     |
| Dietary advice for weight reduction                                                                                                               | 5494331000006116 | NA        | 266724001         | Signposting/Advice                       | Weight loss           |
| Pt advised re wt reducing diet                                                                                                                    | 200241000006114  | 8CA4000   | 266724001         | Signposting/Advice                       | Weight loss           |
| Pt advised re wt reducing diet                                                                                                                    | 918271000006119  | NA        | 918271000006103   | Signposting/Advice                       | Weight loss           |
| Intervention for risk to health associated with overweight and obesity, advice about diet and physical activity                                   | 1753321000006116 | 66CR.00   | 756021000000103   | Signposting/Advice                       | Weight loss           |
| Intervention for risk to health associated with overweight and obesity, advice about diet and physical activity, consider drugs                   | 1753331000006118 | 66CS.00   | 756041000000105   | Signposting/Advice                       | Weight loss           |
| Intervention for risk to health associated with overweight and obesity, advice about diet and physical activity, consider drugs, consider surgery | 1753341000006111 | 66CT.00   | 756061000000106   | Signposting/Advice                       | Weight loss           |
| Intervention for risk to health associated with overweight and obesity, general advice on healthy weight and lifestyle                            | 1753311000006112 | 66CQ.00   | 756001000000107   | Signposting/Advice                       | Weight loss           |
| Signposting to weight management service                                                                                                          | 2714971000000116 | NA        | 1083431000000109  | Signposting/Advice                       | Weight loss           |
| Weight management service opportunity signposted                                                                                                  | 1750991000000117 | 8CdC.00   | 783041000000106   | Signposting/Advice                       | Weight loss           |
| Advice about weight                                                                                                                               | 839191000006115  | 67I9.00   | 410200000         | Signposting/Advice                       | Weight loss           |
| Advice given about weight management                                                                                                              | 1662431000000112 | 8Cd7.00   | 698471002         | Signposting/Advice                       | Weight loss           |

| Term                                            | CPRD code        | Read code | Snomed concept ID | Intervention type             | Intervention category |
|-------------------------------------------------|------------------|-----------|-------------------|-------------------------------|-----------------------|
| Weight loss advised                             | 411892019        | 66C9.11   | 275919002         | Signposting/Advice            | Weight loss           |
| Weight management advice declined               | 1662471000000114 | 8IAu.00   | 698483000         | Signposting/Advice (declined) | Weight loss           |
| Weight reduction diet                           | 6204841000006117 | NA        | 359649009         | Intervention on-site/off-site | Weight loss           |
| Weight-reducing diet education                  | 5494311000006110 | NA        | 266724001         | Intervention on-site/off-site | Weight loss           |
| [V]Dietary counselling in obesity               | 1227771010       | ZV65319   | 424753004         | Intervention on-site/off-site | Weight loss           |
| Has seen dietician - obesity                    | 264756014        | 66C4.00   | 170797005         | Intervention on-site/off-site | Weight loss           |
| Has seen dietitian - obesity                    | 4636861000006111 | NA        | 170797005         | Intervention on-site/off-site | Weight loss           |
| Referral to weight management service offered   | 1709681000000111 | 9NS0300   | 767661000000105   | Intervention on-site/off-site | Weight loss           |
| Weight management programme offered             | 297811000000117  | 66CG.00   | 819361000000109   | Intervention on-site/off-site | Weight loss           |
| Health education - weight management            | 977951000006110  | 679P.00   | 410200000         | Intervention on-site/off-site | Weight loss           |
| Weight management plan completed                | 297861000000115  | 66CJ.00   | 819311000000107   | Intervention on-site/off-site | Weight loss           |
| Weight management plan started                  | 297841000000116  | 66CH.00   | 819321000000101   | Intervention on-site/off-site | Weight loss           |
| Weight reduction clinic                         | 857681000006117  | NA        | 857681000006101   | Intervention on-site/off-site | Weight loss           |
| Attending slimming club                         | 1986761000006119 | NA        | 170801006         | Intervention on-site/off-site | Weight loss           |
| Attends slimming clinic                         | 264760012        | 66C8.00   | 170801006         | Intervention on-site/off-site | Weight loss           |
| Counterweight programme                         | 567001000000116  | 6B4..11   | 313251000000103   | Intervention on-site/off-site | Weight loss           |
| Counterweight weight management programme       | 628891000000118  | 6B4..00   | 313251000000103   | Intervention on-site/off-site | Weight loss           |
| Intensive weight management programme commenced | 2326311000000114 | 66Cb.00   | 904551000000107   | Intervention on-site/off-site | Weight loss           |
| Intensive weight management programme ended     | 2326451000000118 | 66Cc.00   | 904611000000107   | Intervention on-site/off-site | Weight loss           |
| Refer to slimming club                          | 1787271000006110 | NA        | 1787271000006106  | Intervention on-site/off-site | Weight loss           |
| Refer to weight management program              | 6759901000006112 | NA        | 408289007         | Intervention on-site/off-site | Weight loss           |

| Term                                                                             | CPRD code        | Read code | Snomed concept ID | Intervention type                        | Intervention category |
|----------------------------------------------------------------------------------|------------------|-----------|-------------------|------------------------------------------|-----------------------|
| Refer to weight management programme                                             | 2154209017       | 8HHH.00   | 408289007         | Intervention on-site/off-site            | Weight loss           |
| Referral to local authority weight management programme                          | 1721501000000113 | 8HHH000   | 771491000000104   | Intervention on-site/off-site            | Weight loss           |
| Referral to multidisciplinary obesity clinic                                     | 2303211000000117 | 8T11.00   | 894961000000105   | Intervention on-site/off-site            | Weight loss           |
| Referral to residential weight management programme                              | 2173321000000116 | 8HHH100   | 837111000000105   | Intervention on-site/off-site            | Weight loss           |
| Referral to slimming club                                                        | 2134641000000119 | 8Hlf.00   | 819451000000104   | Intervention on-site/off-site            | Weight loss           |
| Referral to weight management GPwSI (general practitioner with special interest) | 8278851000006114 | NA        | 837181000000103   | Intervention on-site/off-site            | Weight loss           |
| Referral to weight management special interest GP                                | 1844501000006115 | 8H4n.00   | 837181000000103   | Intervention on-site/off-site            | Weight loss           |
| Intensive weight management programme declined                                   | 2326491000000114 | 66Cd.00   | 904631000000104   | Intervention on-site/off-site (declined) | Weight loss           |
| Referral to weight management service declined                                   | 1124961000000110 | 8IAM.00   | 506171000000109   | Intervention on-site/off-site (declined) | Weight loss           |

**Table S6. Characteristics of patients by condition-specific medication for sensitivity analysis.**

| Variable                                        | Hypertension medication<br>(n = 1 787 440) |         | Hyperlipidemia medication<br>(n = 1 182 597) |         | Obesity medication<br>(n = 373 767) |         | Obesity medication Orlistat only<br>(n = 130 946) |         |
|-------------------------------------------------|--------------------------------------------|---------|----------------------------------------------|---------|-------------------------------------|---------|---------------------------------------------------|---------|
|                                                 | Median                                     | IQR     | Median                                       | IQR     | Median                              | IQR     | Median                                            | IQR     |
| Year of 1 <sup>st</sup> recorded prescription   | 2015                                       | 2013-17 | 2014                                         | 2012-16 | 2014                                | 2012-16 | 2013                                              | 2011-16 |
| Age <sup>a</sup>                                | 54                                         | 39-67   | 63                                           | 54-72   | 49                                  | 33-67   | 42                                                | 31-53   |
|                                                 | %                                          | n       | %                                            | n       | %                                   | n       | %                                                 | n       |
| Strict diagnosis <sup>b</sup>                   |                                            |         |                                              |         |                                     |         |                                                   |         |
| Before or at 1 <sup>st</sup> prescription       | 26.4                                       | 472 244 | 6.4                                          | 75 443  | 14.1                                | 52 808  | 34.0                                              | 44 451  |
| Up to 1 year after 1 <sup>st</sup> prescription | 31.7                                       | 567 074 | 7.1                                          | 84 317  | 15.6                                | 58 225  | 37.4                                              | 48 929  |
| Extended diagnosis <sup>c</sup>                 |                                            |         |                                              |         |                                     |         |                                                   |         |
| Before or at 1 <sup>st</sup> prescription       | 29.1                                       | 519 254 | 12.5                                         | 147 479 | -                                   | -       | -                                                 | -       |
| Up to 1 year after 1 <sup>st</sup> prescription | 33.7                                       | 602 931 | 13.6                                         | 161 234 | -                                   | -       | -                                                 | -       |
| Gender                                          |                                            |         |                                              |         |                                     |         |                                                   |         |
| Female                                          | 53.7                                       | 960 490 | 45.0                                         | 531 611 | 69.3                                | 259 108 | 76.4                                              | 99 983  |
| Male                                            | 46.3                                       | 826 909 | 55.0                                         | 650 976 | 30.7                                | 114 652 | 23.6                                              | 30 961  |
| Non-binary/unknown                              | < 0.1                                      | 41      | < 0.1                                        | 10      | < 0.1                               | 7       | < 0.1                                             | 2       |

Table shows characteristics of patients who had a recorded medication prescription (regardless of their diagnosis status).

<sup>a</sup> Age in years at time of the first recorded medication prescription.

<sup>b</sup> Diagnosis codes specified in Supplementary Table 1.

<sup>c</sup> Diagnosis codes specified in Supplementary Table 1 and 2.

**Figure S1. Lifestyle intervention before initial prescription of blood pressure- or lipid-lowering medication (diagnosed and undiagnosed)**

**A. Hypertension medication**

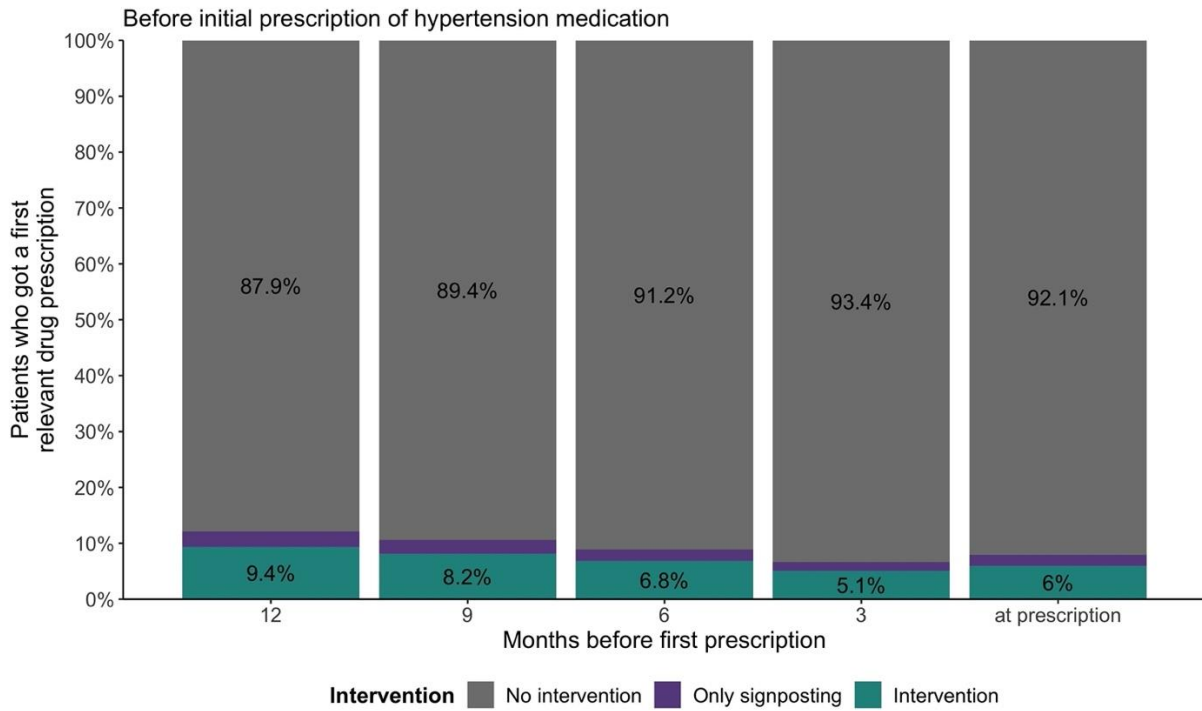

**B. Hyperlipidemia medication**

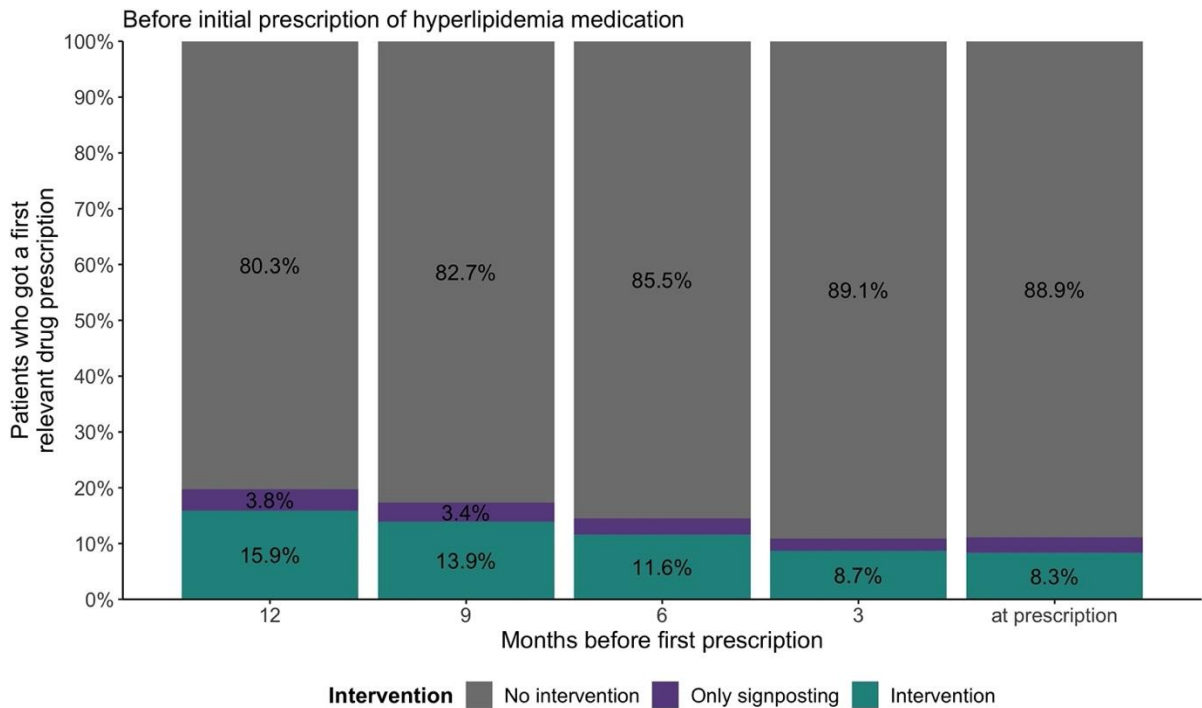

**Figure S2. Lifestyle intervention before initial prescription of anti-obesity or Orlistat medication (diagnosed and undiagnosed)**

**A. Anti-obesity medication (all)**

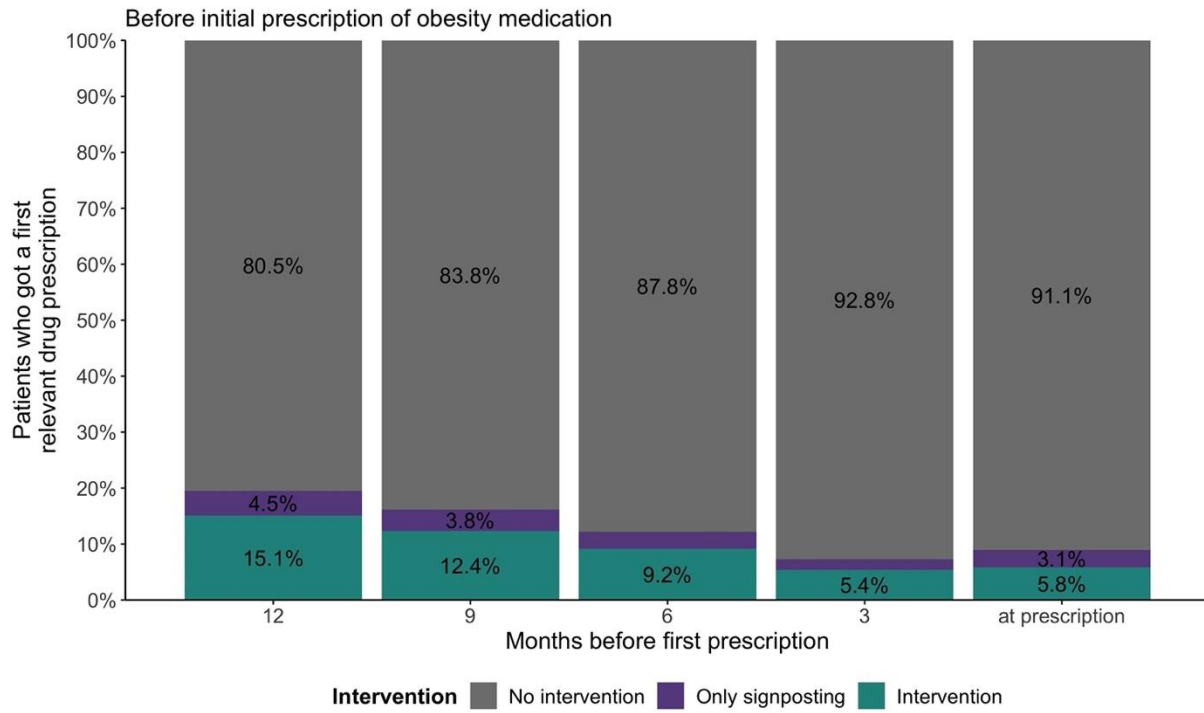

**B. Anti-obesity medication (Orlistat only)**

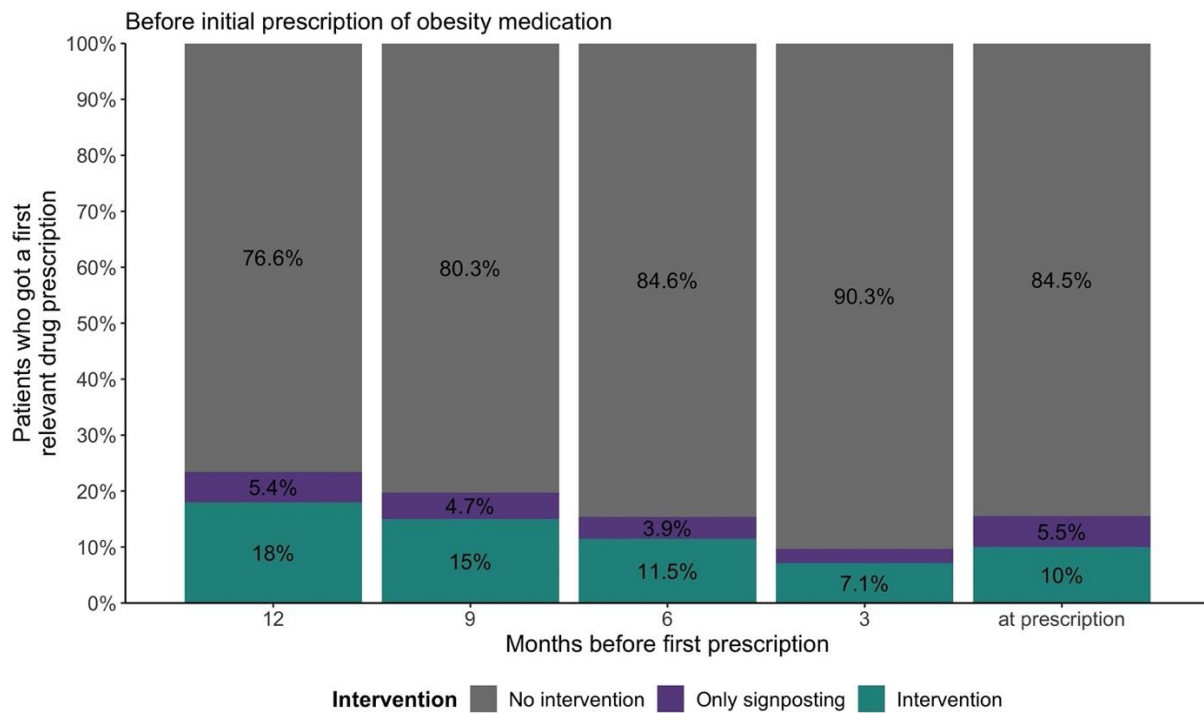

**Figure S1. Lifestyle intervention before initial prescription of blood pressure- or lipid-lowering medication (diagnosed only) <sup>a</sup>**

**A. Hypertension medication**

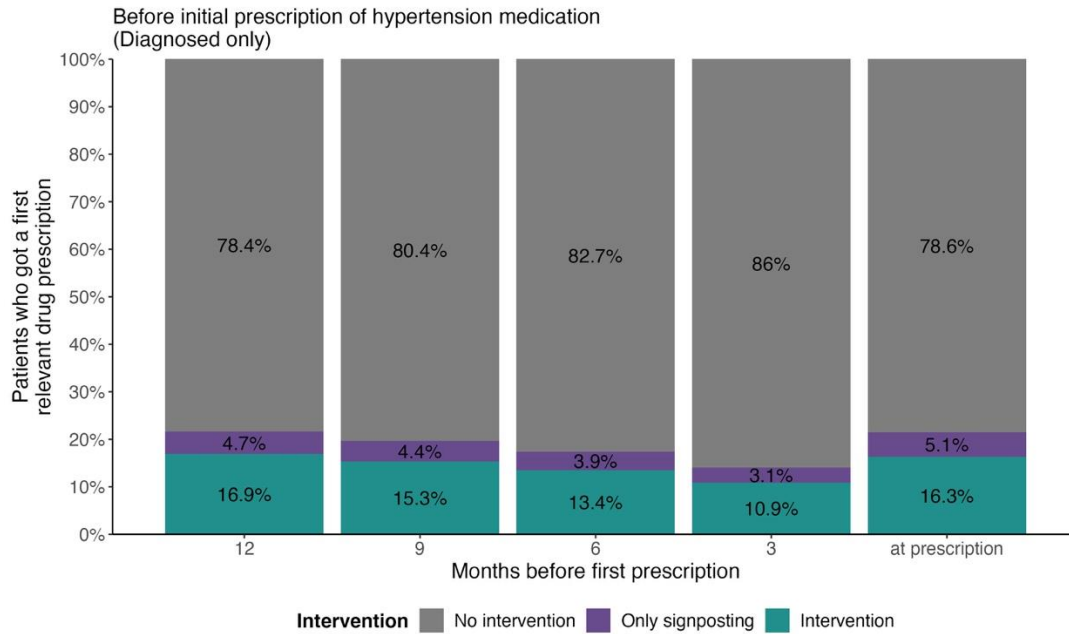

**B. Hyperlipidemia medication**

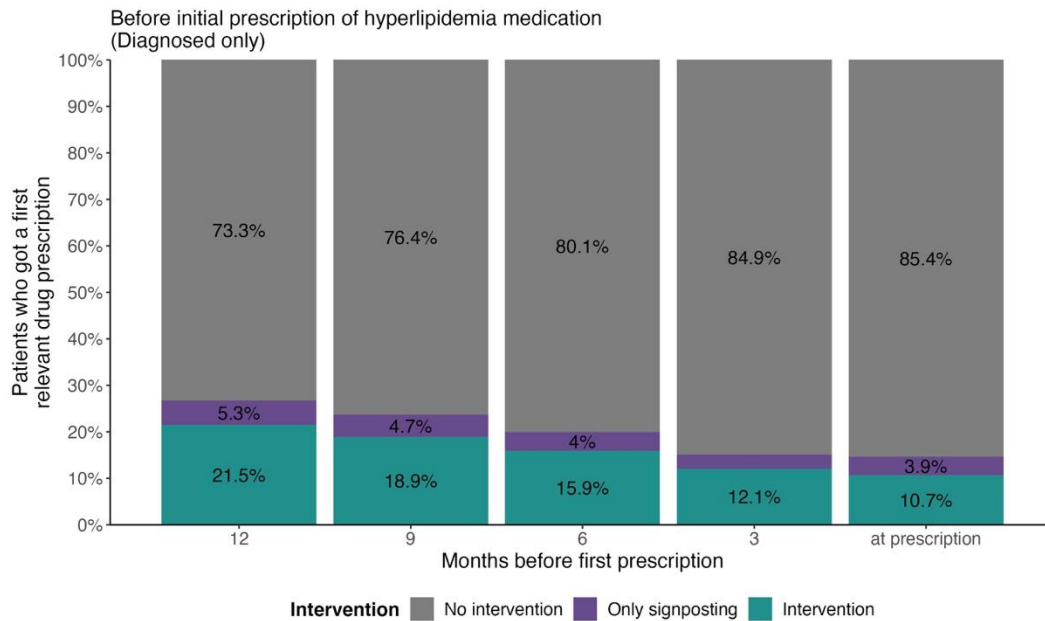

<sup>a</sup> Diagnosed based on strict diagnosis codes that must have been recorded before or at first recorded condition-specific medication prescription. Hypertension medication and diagnosed, n = 472 244, Hyperlipidemia medication and diagnosed, n = 75 443

**Figure S2. Lifestyle intervention before initial prescription of anti-obesity or Orlistat medication (diagnosed only) <sup>a</sup>**

**A. Anti-obesity medication (all)**

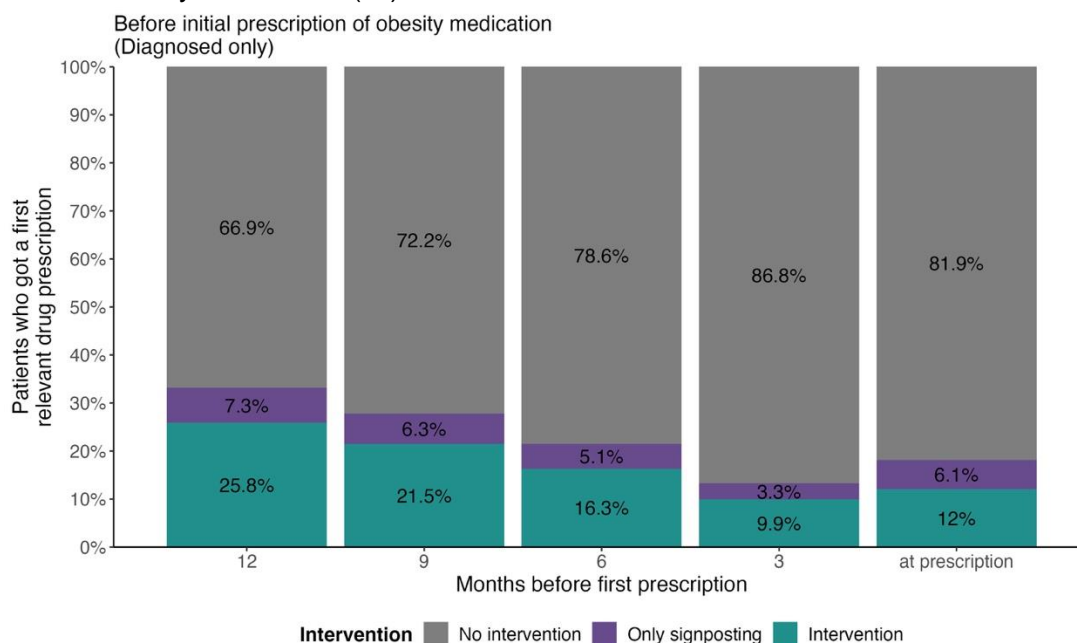

**B. Anti-obesity medication (Orlistat only)**

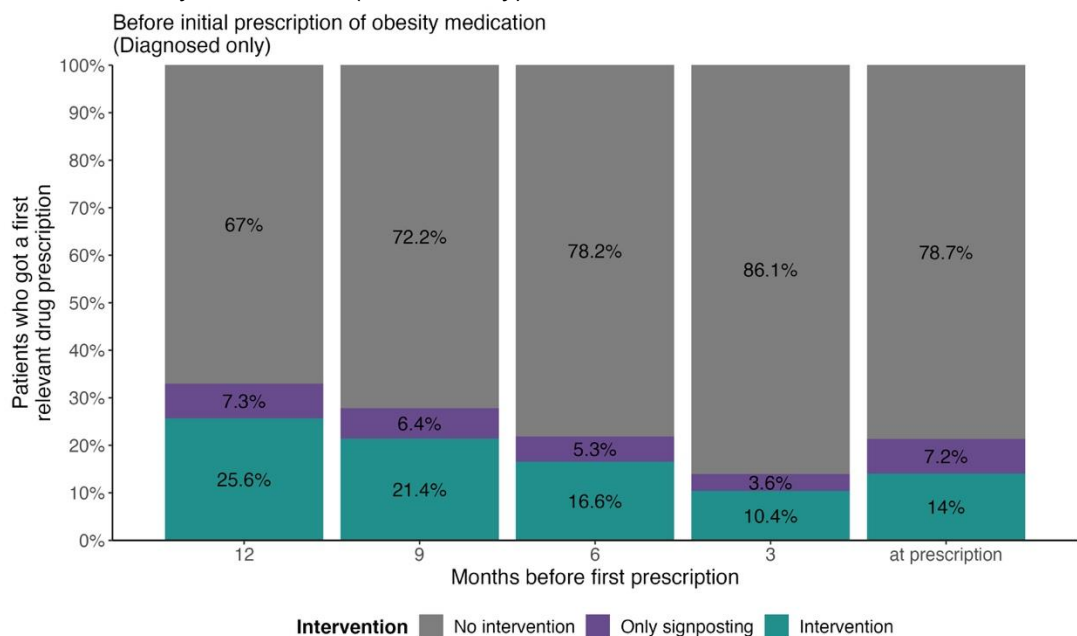

<sup>a</sup> Diagnosed based on strict diagnosis codes that must have been recorded before or at first recorded condition-specific medication prescription. Anti-obesity medication and diagnosed, n = 52 808. Orlistat only and diagnosed, n = 44 451.
